1       **Co-expression enrichment analysis at the single-cell level reveals convergent defects in**  
2       **neural progenitor cells and their cell-type transitions in neurodevelopmental disorders**

3  
4       Kaifang Pang<sup>1,2,3,11\*</sup>, Li Wang<sup>2,4,5,6,11</sup>, Wei Wang<sup>2,4</sup>, Jian Zhou<sup>2,4</sup>, Chao Cheng<sup>7,8</sup>, Kihoon Han<sup>9</sup>,  
5       Huda Y. Zoghbi<sup>1,2,4,10</sup> & Zhandong Liu<sup>1,2,3\*</sup>

6  
7       1 Department of Pediatrics-Neurology, Baylor College of Medicine, Houston, TX 77030, USA

8       2 Jan and Dan Duncan Neurological Research Institute, Texas Children's Hospital, Houston, TX 77030,  
9       USA

10       3 Computational and Integrative Biomedical Research Center, Baylor College of Medicine, Houston, TX  
11       77030, USA

12       4 Department of Molecular and Human Genetics, Baylor College of Medicine, Houston, TX 77030, USA

13       5 Department of Neurology, University of California, San Francisco, San Francisco, CA 94143, USA

14       6 The Eli and Edythe Broad Center of Regeneration Medicine and Stem Cell Research, University of  
15       California, San Francisco, San Francisco, CA 94143, USA

16       7 Department of Medicine, Baylor College of Medicine, Houston, TX 77030, USA

17       8 Institute for Clinical and Translational Research, Baylor College of Medicine, Houston, TX 77030,  
18       USA

19       9 Department of Neuroscience, College of Medicine, Korea University, Seoul 02841, South Korea

20       10 Howard Hughes Medical Institute, Baylor College of Medicine, Houston, TX 77030, USA

21       11 These authors contributed equally to this work.

22       \* Correspondence should be addressed to K.P. ([kpang@bcm.edu](mailto:kpang@bcm.edu)), or Z.L. ([zhandong.liu@bcm.edu](mailto:zhandong.liu@bcm.edu)).  
23  
24

25 **Abstract**

26           Recent large-scale sequencing studies have identified a great number of genes whose disruptions  
27 cause neurodevelopmental disorders (NDDs). However, cell-type-specific functions of NDD genes and  
28 their contributions to NDD pathology are unclear. Here, we integrated NDD genetics with single-cell  
29 RNA sequencing data to identify cell-type and temporal convergence of genes involved in different  
30 NDDs. By assessing the co-expression enrichment pattern of various NDD gene sets, we identified mid-  
31 fetal cortical neural progenitor cell development—more specifically, ventricular radial glia-to-  
32 intermediate progenitor cell transition at gestational week 10—as a key convergent point in autism  
33 spectrum disorder (ASD) and epilepsy. Integrated gene ontology-based analyses further revealed that  
34 ASD genes function as upstream regulators to activate neural differentiation and inhibit cell cycle during  
35 the transition, whereas epilepsy genes function as downstream effectors in the same processes, offering a  
36 potential explanation for the high comorbidity rate of the two disorders. Together, our study provides a  
37 framework for investigating the cell-type-specific pathophysiology of NDDs.

38

## 39 **Introduction**

40 Over the past decade, large-scale exome and genome sequencing studies have firmly established  
41 that *de novo* protein-altering variants contribute significantly to NDDs, including ASD (Iossifov et al.  
42 2014; De Rubeis et al. 2014; Krumm et al. 2015; Sanders et al. 2015; C Yuen et al. 2017), epilepsy (Allen  
43 et al. 2013; EuroEPINOMICS-RES Consortium et al. 2017; Heyne et al. 2018), intellectual disability (ID)  
44 (de Ligt et al. 2012; Rauch et al. 2012; Lelieveld et al. 2016), and developmental delay (DD)  
45 (Deciphering Developmental Disorders Study 2017). Although hundreds of genes with *de novo* protein-  
46 altering mutations in a specific NDD have been identified, each gene accounts only for up to a few cases,  
47 demonstrating the high heterogeneity of the underlying genetic landscapes. With the diverse and  
48 pleiotropic functions of these disease-associated genes, it is challenging to directly pinpoint disease-  
49 specific pathophysiology. However, given the similarity of phenotypic symptoms within each NDD, it is  
50 reasonable to hypothesize that disease-causing genes in a specific NDD functionally converge on  
51 common brain developmental events. Moreover, NDDs share genetic etiology and comorbidities are  
52 frequently found, suggesting that convergences of different NDDs may overlap with each other (Anttila et  
53 al. 2018; Lo-Castro and Curatolo 2014). Identification of these convergences will undoubtedly contribute  
54 to the mechanistic understanding of NDD pathophysiology and potentially lead to novel treatments.

55 Several systems-level studies have made significant progress in identifying convergences of NDD  
56 genes through integrating NDD genes with functional data, such as gene co-expression and protein-  
57 protein interaction (Parikshak et al. 2013; Willsey et al. 2013; Hormozdiari et al. 2015; Chang et al. 2015;  
58 Krishnan et al. 2016; Shohat et al. 2017; Lin et al. 2015). For example, Parikshak et al. (2013) applied the  
59 weighted gene co-expression network analysis to identify modules of co-expressed genes that are  
60 enriched for ASD genes (Parikshak et al. 2013). Their top-down analyses suggest that at the circuit level,  
61 ASD genes are enriched in superficial cortical layers and glutamatergic projection neurons during fetal  
62 cortical development. Willsey et al. (2013) took a bottom-up approach by focusing on nine high-  
63 confidence ASD genes and searching for spatiotemporal conditions in which probable ASD genes co-  
64 express with these nine genes (Willsey et al. 2013). Using this strategy, they suggest that glutamatergic

65 projection neurons in deep cortical layers of human mid-fetal prefrontal and primary motor-  
66 somatosensory cortex are a key point of ASD gene convergence. Hormozdiari et al. (2015), on the other  
67 hand, integrated gene co-expression with protein-protein interaction networks to identify modules that  
68 enrich for genes mutated in several NDDs (Hormozdiari et al. 2015). Their results demonstrate that  
69 different NDDs share a major point of gene convergence during early embryonic brain development.  
70 Although the above mentioned and other studies (Chang et al. 2015; Krishnan et al. 2016; Shohat et al.  
71 2017; Lin et al. 2015) applied different methods, the main conclusions are strikingly similar: a substantial  
72 subset of ASD and/or other NDD genes converge in fetal cortical development. In addition, dysfunction  
73 of fetal cortical development has also been implicated in other neuropsychiatric disorders including  
74 schizophrenia (Gulsuner et al. 2013; Gilman et al. 2012).

75 The majority of co-expression analyses on NDDs utilized the BrainSpan dataset, a spatiotemporal  
76 gene expression data from the developing human brain (Kang et al. 2011). While this dataset is  
77 instrumental in assessing transcriptional changes during human brain development, it was collected from  
78 bulk brain tissue, making it hard to investigate cell-type-specific co-expression patterns to elucidate the  
79 underlying disease mechanisms. Recently, the development of single-cell RNA sequencing (scRNA-seq)  
80 technology enabled us to interrogate the transcriptomics at the single-cell level. For instance, Zhong et al.  
81 (2018) recently reported the scRNA-seq profiles of more than 2,300 single cells in the developing human  
82 prefrontal cortex (Zhong et al. 2018). This kind of data provides an unprecedented opportunity to  
83 understand NDD pathophysiology in a cell-type-specific manner.

84 Here, by integrating disease genes from the four NDDs with the scRNA-seq dataset from the  
85 human developing prefrontal cortex, we not only identified disease-specific convergence of NDD genes  
86 in specific cell types/stages/transitions but also highlighted the critical cellular processes affected in ASD  
87 and epilepsy.

88

## 89 **Results**

### 90 **Identification of high-confidence genes associated with NDDs**



91 To identify high-confidence risk genes associated with each NDD, we first interrogated genes  
92 with *de novo* protein-altering variants for the four NDDs in the denovo-db database (Turner et al. 2017)  
93 and non-redundant data for epilepsy (Epi) from two studies (EuroEPINOMICS-RES Consortium et al.  
94 2017; Heyne et al. 2018). Loss-of-function (nonsense, frameshift, and canonical splice site) mutations  
95 generally lead to disruption of gene function, whereas missense mutations can cause hypomorphic,  
96 hypermorphic, antimorphic, or neomorphic effects. Thus, for each NDD, we divided the associated genes  
97 into two categories: genes with *de novo* loss-of-function (dnLoF) mutations and genes with *de novo*  
98 missense (dnMis) mutations. To select the most relevant genes for each NDD, we only included genes  
99 with at least two or three (depending on gene set sizes) *de novo* mutations of the same category in each  
100 specific disorder (see Methods). In total, we defined eight high-confidence NDD gene sets: dnLoF-ASD,  
101 dnLoF-Epi, dnLoF-ID, dnLoF-DD, dnMis-ASD, dnMis-Epi, dnMis-ID, and dnMis-DD (**Supplementary**  
102 **Table S1A**). There are some overlaps among different gene sets, which is expected given the high  
103 comorbidity among these NDDs (**Supplementary Fig. S1**).

104

### 105 **Different NDD gene sets display distinct co-expression enrichment across major cortical cell types**

106 Previous co-expression analyses on NDDs used transcriptomic data from bulk brain tissue  
107 (Parikshak et al. 2013; Willsey et al. 2013; Hormozdiari et al. 2015; Lin et al. 2015). While these analyses  
108 are important to identify critical developmental stages and biological processes involved in the specific  
109 NDD, it is challenging to dissect cell-type-specific contributions to the disease pathophysiology.  
110 Dysfunction of the prefrontal cortex has been implicated in multiple NDDs (Xiong et al. 2007; Gulsuner  
111 et al. 2013; Willsey et al. 2013; Arnsten 2006; Parikshak et al. 2013). To investigate the co-expression  
112 dynamics of NDD genes in specific cell types during the human prefrontal cortex development, we  
113 utilized a recently published scRNA-seq dataset (Zhong et al. 2018) containing more than 2,300 single  
114 cells of the developing human prefrontal cortex from gestational weeks (GWs) 8 to 26. Six major cell  
115 classes are identified in this dataset: neural progenitor cells (NPCs), excitatory neurons, interneurons,

116 astrocytes, oligodendrocyte progenitor cells (OPCs), and microglia. Thus, we performed co-expression  
117 analyses of the different NDD gene sets using the transcriptomic data from each of these cell types.

118 We reasoned that if mutations in different genes can cause similar symptoms in affected  
119 individuals, these genes are more likely to functionally converge at some processes and stages in brain  
120 development, potentially within a specific cell type. This functional convergence should be reflected by  
121 an increase in the level of co-expression within a particular NDD gene set compared with the overall co-  
122 expression level of all the expressed genes (background genes) in that cell type. We first calculated the  
123 pairwise Spearman's correlation coefficients between background genes in each cell type and defined the  
124 top 0.5% pairs of genes with the highest correlation coefficients as significant co-expressed gene pairs.  
125 We then calculated the fraction of significant co-expressed gene pairs out of all pairs of genes in the NDD  
126 gene set and divided it by 0.5% to get a co-expression fold enrichment score of the NDD gene set (see  
127 Methods). A high co-expression fold enrichment score of an NDD gene set indicates that the genes in the  
128 NDD gene set are more significantly co-expressed than background genes. To verify the enrichment in  
129 NDD gene sets is indeed specific and disease-relevant, we also included several control gene sets,  
130 including genes with dnLoF mutations in unaffected ASD siblings (Turner et al. 2017), genes with LoF  
131 mutations in the general population (Lek et al. 2016), brain-specific gene regulatory factors (Brain-GRF)  
132 (Berto et al. 2016), and synaptic genes (Koopmans et al. 2019) (**Supplementary Table S1A**).

133 We calculated co-expression fold enrichment scores for the eight NDD gene sets and four control  
134 gene sets across the six major cell types (**Fig. 1A; Supplementary Fig. S2**). In general, NDD gene sets  
135 show significantly higher co-expression enrichment than control gene sets (**Fig. 1A; Supplementary Fig.**  
136 **S2 and S3**). Several interesting co-expression enrichment patterns can be found. First, the majority of  
137 NDD gene sets show high co-expression enrichment in NPCs, suggesting a convergent involvement of  
138 NPCs in different NDDs (**Fig. 1A**). Moreover, dnLoF-ASD and dnMis-Epi genes stand out as having the  
139 highest co-expression enrichment scores in particular cell types (**Fig. 1A; Supplementary Fig. S4**).  
140 Specifically, dnLoF-ASD genes have the highest co-expression in NPCs (18.8-fold enrichment),  
141 suggesting a significant contribution of NPCs to ASD pathophysiology (**Fig. 1A**). Interestingly, dnMis-

142 ASD genes show low co-expression enrichment in the six major cell types (**Fig. 1A**). This is consistent  
143 with the previous estimation that ~43% of dnLoF mutations contribute to ASD diagnosis but only ~13%  
144 of dnMis mutations do so (Iossifov et al. 2014). Instead, dnMis-Epi genes are highly co-expressed in  
145 NPCs, excitatory neurons, and, more prominently, interneurons (**Fig. 1A**). This is in line with previous  
146 findings that dnMis mutations significantly contribute to the etiology of epilepsy (Hamdan et al. 2017;  
147 Heyne et al. 2018) and dysfunction in interneurons contributes to the pathophysiology of epilepsy (Lado  
148 et al. 2013; Noebels 2015). Compared with ASD and epilepsy genes, ID and DD genes do not exhibit  
149 comparable enrichment, suggesting less functional convergences of these disease genes. Collectively, our  
150 findings reveal that cell-type-specific functional convergences of NDD genes correlate with the  
151 underlying genetic architecture of NDDs.

152 To determine whether the observed co-expression enrichment reflects true biological signal or is  
153 confounded by other factors (Crow et al. 2016; McCall et al. 2016; Skinnider et al. 2019), we  
154 systematically tested the possible confounders. We found that the co-expression enrichment is robust to  
155 changes in the co-expression threshold (**Supplementary Fig. S5 and S6**) and correlation-based measures  
156 of association (**Supplementary Fig. S7**). The co-expression enrichment also remains similar after  
157 controlling for gene set size difference (**Supplementary Fig. S8**), gene expression level dependence  
158 (**Supplementary Fig. S9**), and severity of missense mutations (**Supplementary Fig. S10**). Because cell  
159 numbers vary across the six major cell types (**Fig. 1A; Supplementary Table S1B**), we downsampled the  
160 same number of cells for each major cell type to make the co-expression enrichment scores comparable.  
161 We found that reducing cell numbers generally decreases the co-expression enrichment scores (**Fig. 1B,C;**  
162 **Supplementary Fig. S11**), consistent with the previous finding that larger cell numbers facilitate the  
163 reconstruction of more robust and coherent networks (Skinnider et al. 2019). However, even after  
164 downsampling, dnLoF-ASD genes still have the highest co-expression in NPCs (**Fig. 1B**), and dnMis-Epi  
165 genes are still highly co-expressed in NPCs and interneurons (**Fig. 1C**). Although we used percentile-  
166 based cutoff for co-expression enrichment analysis to mitigate the effect of global co-expression  
167 differences across cell types, the findings are consistent with results from absolute correlation analysis

168 **(Supplementary Fig. S12 and S13)**. An unexpected finding is that dnMis-Epi genes have the highest co-  
169 expression in microglia after downsampling (**Fig. 1C**). Although microglia have been implicated in  
170 epilepsy (Vezzani et al. 2011, 2013), we focused on NPCs and interneurons for further analysis as they  
171 have larger sample sizes thus more robust signals.

172 **Supplementary Fig. S14 and S15** present several examples of dnLoF-ASD and dnMis-Epi gene  
173 pairs that show higher co-expression in NPCs and interneurons, respectively. **Fig. 1D,E** show the co-  
174 expression networks for dnLoF-ASD and dnMis-Epi genes in the six major cell types using the original  
175 sample size, highlighting the larger number of network edges in the cell types with higher co-expression  
176 enrichment.

177

#### 178 **ASD and epilepsy genes co-express at specific developmental stages within NPCs and interneurons**

179 Our analyses indicate that the functions of dnLoF-ASD genes converge in NPCs and the  
180 functions of dnMis-Epi genes converge in NPCs and interneurons. To determine the specific  
181 developmental stages that contribute to the co-expression of dnLoF-ASD and dnMis-Epi genes in NPCs  
182 and interneurons, we further performed co-expression enrichment analysis of these two gene sets at  
183 different time points. To overcome the effect caused by sample size difference and increase the accuracy  
184 of co-expression enrichment score estimation, we focused on cell stages with at least 50 cells and  
185 downsampled the same number of cells for each cell stage to make results comparable (**Fig. 2A-C**;  
186 **Supplementary Fig. S16**). Apart from NPCs and interneurons where ASD and epilepsy genes show  
187 enrichment, we also included excitatory neurons for comparison (**Fig. 2B**).

188 In NPCs, dnLoF-ASD genes are highly co-expressed at GW10 and, to a lesser extent, GW16 (**Fig.**  
189 **2A; Supplementary Fig. S16A**). GW10 and GW16 are two critical developmental stages for NPCs.  
190 NPCs can be further divided into three categories: ventricular radial glia (vRG) cells, outer radial glia  
191 (oRG) cells, and intermediate progenitor cells (IPCs) (Lui et al. 2011). The proliferation of IPCs peaks at  
192 GW10 and GW16, and they are primarily located in the subventricular zone (SVZ) and outer  
193 subventricular zone (oSVZ), respectively (Zhong et al. 2018).

194 At GW10, vRG cells give rise to IPCs in the SVZ which further differentiate into deep-layer  
195 neurons (Nowakowski et al. 2016). Interestingly, dnLoF-ASD genes show little to no co-expression  
196 enrichment in vRG cells or IPCs alone at GW10 (**Fig. 2D; Supplementary Fig. S17A and S18A**).  
197 However, a high co-expression enrichment score was found when vRG cells and IPCs were combined  
198 (**Fig. 2D; Supplementary Fig. S17A and S18A**). **Supplementary Fig. S19** presents several examples of  
199 dnLoF-ASD gene pairs that show high co-expression during the vRG-to-IPC transition at GW10. These  
200 results indicate that gene expression variations within vRG cells or IPCs barely contribute to the co-  
201 expression of dnLoF-ASD genes in NPCs at GW10. Instead, gene expression variations due to cell-type  
202 differences between vRG cells and IPCs largely explain the co-expression enrichment. Consistent with  
203 this, we found that the majority of dnLoF-ASD genes concurrently increase their expression during the  
204 transition from vRG cells to IPCs at GW10 (**Fig. 2G; Supplementary Table S2**). In addition to dnLoF-  
205 ASD genes with  $\geq 3$  dnLoF mutations, ASD genes with one or two dnLoF mutations and all the SFARI  
206 curated gene sets except category six (Basu et al. 2009) also display increased expression during the vRG-  
207 to-IPC transition (**Supplementary Fig. S21**). Together, these results highlight the functional convergence  
208 of ASD genes in the transition from vRG cells to IPCs at GW10.

209 At GW16, vRG cells not only give rise to IPCs in the SVZ but also produce oRG cells that will  
210 migrate to the oSVZ (Nowakowski et al. 2016; Lui et al. 2011; Fietz et al. 2010; Hansen et al. 2010). In  
211 the oSVZ, oRG cells give rise to IPCs that further differentiate into upper-layer neurons (Nowakowski et  
212 al. 2016; Lui et al. 2011). We performed similar co-expression enrichment analyses on individual cell  
213 types and their combinations. We found that while vRG cells do not show co-expression enrichment, oRG  
214 cells and IPCs show moderate co-expression enrichment at GW16 (**Fig. 2E; Supplementary Fig. S17B**  
215 **and S18B**). However, the co-expression enrichment is not increased in the combination of oRG cells and  
216 IPCs, suggesting that gene expression variations both within oRG cells/IPCs and during their transition  
217 contribute to the co-expression of dnLoF-ASD genes in NPCs at GW16 (**Fig. 2E,F; Supplementary Fig.**  
218 **S17B and S18B,C**). Consistently, we found that dnLoF-ASD genes do not show expression change  
219 during the transition at GW16 from vRG cells to oRG cells, vRG cells to IPCs, and oRG cells to IPCs

220 **(Supplementary Fig. S22)**. Similar results were obtained when analyzing dnMis-Epi genes in NPCs (**Fig.**  
221 **2A,D-G; Supplementary Fig. S16A, S17, S18, S20 and S22**), whereas the co-expression enrichment  
222 score of dnMis-Epi genes at GW16 is generally lower compared with the score of dnLoF-ASD genes at  
223 GW16 (**Fig. 2A**). **Figure 2H,I** show co-expression network comparison between individual cell types and  
224 the cell-type transition at GW10 for dnLoF-ASD and dnMis-Epi genes using the original sample size.

225 In excitatory neurons, both dnLoF-ASD and dnMis-Epi genes show moderate to no co-expression  
226 enrichment (**Fig. 2B**) despite their elevated absolute correlation at GW16 (**Supplementary Fig. S16B**). In  
227 interneurons, dnMis-Epi genes are highly co-expressed at later developmental stages, particularly GW23  
228 (**Fig. 2C; Supplementary Fig. S16C**). This coincides with the axon development and cell maturation  
229 processes of interneurons in the prefrontal cortex (Zhong et al. 2018).

230

### 231 **Co-expression pattern of ASD and epilepsy genes during the differentiation from NPCs to** 232 **excitatory neurons**

233 The above analyses focused on co-expression within a major cell type, which mainly captures cell  
234 maturation and state changes. To understand whether dnLoF-ASD or dnMis-Epi genes co-function during  
235 cell differentiation, we analyzed the co-expression pattern of these two gene sets during NPC terminal  
236 differentiation (**Fig. 3A,B**). Due to the sample size limitation (**Supplementary Table S1B**), we focused  
237 on the NPC-to-excitatory neuron differentiation at GW10 and GW16 whose time-matched cell stages  
238 containing at least 50 samples in both NPCs and excitatory neurons. Excitatory neurons sampled from  
239 GW10 and GW16 are mostly deep-layer neurons and upper-layer neurons, respectively (**Supplementary**  
240 **Fig. S23**). We found that both dnLoF-ASD and dnMis-Epi genes display lower co-expression enrichment  
241 in either excitatory neurons or the combination of NPCs and excitatory neurons than in NPCs (**Fig. 3A,B;**  
242 **Supplementary Fig. S24**). Also, no co-expression increase was observed during the differentiation from  
243 NPC subtypes to excitatory neurons (**Supplementary Fig. S25A,B and S26A-C**). However, both dnLoF-  
244 ASD and dnMis-Epi genes tend to increase their expression during the NPC-to-excitatory neuron  
245 differentiation, especially at GW16 (**Fig. 3C,D; Supplementary Fig. S25C,D and S26D-F**;

246 **Supplementary Table S3**). These results suggest that at the individual gene level, ASD and epilepsy  
247 genes generally become more abundant/important, yet their functions become more diverse and less  
248 convergent in differentiated excitatory neurons than in NPCs.

249

#### 250 **Biological pathways associated with ASD and epilepsy genes during the NPC transition at GW10**

251 The above analyses highlight that both dnLoF-ASD and dnMis-Epi genes converge in the vRG-  
252 to-IPC transition at GW10. To systematically pinpoint the function of these genes during this transition,  
253 we developed a gene ontology (GO) functional analysis method called GO correlation analysis (see  
254 Methods). GO correlation analysis was used to determine the correlation between a given gene set and  
255 any GO term in a context-dependent manner. Using this method, we calculated Spearman's correlation  
256 for all the GO biological process terms with ASD or epilepsy genes during the vRG-to-IPC transition at  
257 GW10. We found that ASD genes are positively correlated with genes involved in neurogenesis and  
258 neural differentiation (**Fig. 4A; Supplementary Table S4A**) and are negatively correlated with genes  
259 involved in cell cycle and cellular respiration (**Fig. 4C; Supplementary Table S4C**). Like ASD genes,  
260 genes in GO terms that show positive correlation also increase their expression during the transition (**Fig.**  
261 **4A; Supplementary Table S4A**). Instead, genes in GO terms that show negative correlations, especially  
262 those involved in the cell cycle, tend to decrease their expression during the transition (**Fig. 4C;**  
263 **Supplementary Table S4C**). These observations are consistent with the fact that IPCs exhibit increased  
264 neuronal commitment and decreased proliferation capacity compared with vRG cells (Noctor et al. 2004).  
265 Similar results were obtained when dnMis-Epi genes were analyzed (**Fig. 4B,D; Supplementary Table**  
266 **S4B,D**). These results suggest that both dnLoF-ASD and dnMis-Epi genes are involved in neuron  
267 differentiation and cell cycle pathways during the transition.

268

269 **Upstream versus downstream involvement of ASD and epilepsy genes during the NPC transition at**  
270 **GW10**



271 It seems that both dnLoF-ASD and dnMis-Epi genes are involved in the same biological  
272 pathways during the NPC transition at GW10. However, the manifestations of these two disorders are  
273 dissimilar, indicating that the underlying molecular and cellular mechanisms might be different. To  
274 determine the difference in ASD versus epilepsy gene functions in NPCs, we examined the composition  
275 of each gene set. We found that ASD genes are enriched in GO terms like chromatin modification and  
276 organization, but not in the GO terms like neurogenesis and neural differentiation, which are positively  
277 correlated with ASD genes (**Fig. 5A; Supplementary Table S5A**). Instead, epilepsy genes are both  
278 enriched and positively correlated with GO terms like neurogenesis and neural differentiation (**Fig. 5B;**  
279 **Supplementary Table S5B**). Given that chromatin modification and organization are critical for  
280 transcriptional regulation and dozens of ASD-associated chromatin regulators have well-known  
281 regulatory functions in neurogenesis (Ronan et al. 2013; Ernst 2016; Courchesne et al. 2019), these  
282 results suggest that ASD genes serve as upstream regulators to control the transcription of other genes in  
283 these pathways to promote the NPC transition at GW10. On the other hand, epilepsy genes themselves  
284 could be downstream targets regulated by chromatin regulators and thus serve as downstream effectors in  
285 the transition. In addition, both ASD and epilepsy genes do not show enrichment with cell cycle-related  
286 GO terms that they negatively correlate with (**Fig. 5C,D; Supplementary Table S5C,D**). In this respect,  
287 ASD genes might also repress the cell cycle through transcriptional regulation.

288

### 289 ***CHD8* regulates transcription to promote neural differentiation and inhibit cell cycle**

290 To test if dnLoF-ASD genes are indeed upstream regulators in the NPC transition, we took the  
291 chromatin remodeling gene *CHD8*—a key high-confidence ASD gene (Bernier et al. 2014)—as an  
292 example. *CHD8* is a hub gene in the vRG-to-IPC transition network at GW10 (**Fig. 2H**). Gompers et al.  
293 (2017) generated germline *Chd8* haploinsufficiency mice and performed RNA-seq analysis using  
294 forebrain tissue at five developmental stages (E12.5, E14.5, E17.5, P0, and adult) (Gompers et al. 2017).  
295 The top 300 downregulated and top 300 upregulated genes in *Chd8* haploinsufficiency versus wild-type  
296 mice at each developmental stage were defined as *CHD8*-activated and -repressed genes, respectively (see



297 Methods and **Supplementary Table S6A**). Interestingly, only *CHD8*-activated genes at E14.5 are both  
298 preferentially bound by *CHD8* (Gompers et al. 2017) and enriched for ASD genes (**Supplementary Fig.**  
299 **S27**), suggesting that they are more likely genuine *CHD8* target genes that involve in ASD pathology.  
300 Thus, we deemed *CHD8*-activated and -repressed genes at E14.5 as *CHD8* target genes in ASD.

301 We first analyzed the expression pattern of these *CHD8* target genes in human GW10 NPCs. As  
302 shown in **Fig. 2H**, *CHD8* doubles its expression during the vRG-to-IPC transition at GW10  
303 (**Supplementary Table S2**). As expected, we observed that *CHD8*-activated target genes also exhibit  
304 significant expression increase and *CHD8*-repressed target genes show significant expression decrease  
305 compared with the background genes during the transition (**Fig. 6A**; **Supplementary Table S6B**).  
306 Consistently, *CHD8* is more positively correlated with *CHD8*-activated target genes and more negatively  
307 correlated with *CHD8*-repressed target genes than the background genes (**Fig. 6B**; **Supplementary Table**  
308 **S6C**). Moreover, *CHD8*-activated target genes are enriched with GO terms related to neurogenesis and  
309 neuron development (**Fig. 6C**; **Supplementary Table S6D**), whereas *CHD8*-repressed target genes are  
310 enriched with GO terms related to cell cycle (**Fig. 6D**; **Supplementary Table S6E**). Together, these  
311 results indicate that *CHD8* promotes the vRG-to-IPC transition at GW10 through transcriptionally  
312 activating neural differentiation pathways and repressing cell cycle-related processes. Thus, *CHD8*  
313 haploinsufficiency could disrupt the vRG-to-IPC transition at GW10 and shift the proliferation-  
314 differentiation balance of vRG cells towards proliferation. Indeed, *Chd8* haploinsufficiency mice show an  
315 increase in radial glia cells and a decrease in IPCs during embryonic brain development (Gompers et al.  
316 2017).

317 Collectively, these findings suggest that dnLoF-ASD genes like *CHD8* promote the cell-type  
318 transition program by transcriptional regulation of the downstream effectors. On the contrary, dnMis-Epi  
319 genes function as effectors that directly participate in the transition processes. Both perturbations would  
320 likely affect neural differentiation. However, upstream perturbation by ASD gene mutations could also  
321 affect early events of the transition, disrupting the proliferation-differentiation balance of NPCs. Together,

322 these results indicate that mutations of upstream versus downstream genes involved in the same pathways  
323 could lead to distinct phenotypic outcomes.

324

### 325 **Co-expression enrichment of NDD genes faithfully represents NDD pathophysiology**

326 All of our co-expression enrichment analyses are based on the assumption that the functional  
327 convergences of high-confidence NDD genes represent the core pathways underlying the disease  
328 mechanisms. If this assumption is correct, one would expect that low-confidence NDD genes would also  
329 converge to the core pathways. To test this possibility, we calculated Spearman's correlation with dnLoF-  
330 ASD genes in NPCs for dnLoF-ASD genes (with  $\geq 3$  dnLoF mutations) and ASD genes with fewer dnLoF  
331 mutations. As expected, we found that ASD genes harboring two or one dnLoF mutations have a  
332 significantly higher correlation with dnLoF-ASD genes than genes harboring no dnLoF mutations,  
333 independently validating that the co-expression enrichment of dnLoF-ASD genes in NPCs captures the  
334 true ASD pathology (**Fig. 7A; Supplementary Table S7A**). Similar results were obtained for dnMis-Epi  
335 genes in interneurons (**Fig. 7B; Supplementary Table S7B**).

336 In addition, we found that the Spearman's correlations with dnLoF-ASD genes in NPCs for  
337 dnLoF-ASD genes are significantly higher than those for ASD genes with fewer mutations, and the  
338 Spearman's correlations with dnMis-Epi genes in interneurons for dnMis-Epi genes are significantly  
339 higher than those for epilepsy genes with fewer mutations (**Fig. 7A,B**). These results suggest that genes  
340 with more mutations tend to be at the core position of the NDD gene co-expression network while genes  
341 with fewer mutations tend to be in the peripheral region of the network. To test this hypothesis, we  
342 constructed an NPC co-expression network of all the ASD genes with dnLoF mutations (**Fig. 7C;**  
343 **Supplementary Table S7C**) and an interneuron co-expression network of all the epilepsy genes with  
344 dnMis mutations (**Fig. 7D; Supplementary Table S7D**). Consistent with our hypothesis, we found that  
345 genes with more mutations tend to be at the core position of the network, as indicated by a significantly  
346 higher co-expression degree than genes with fewer mutations (**Fig. 7E,F; Supplementary Table S7E,F**).  
347 Together, these findings validate that co-expression enrichment of NDD genes faithfully represents NDD

348 mechanisms and provide an explanation of why some NDD genes have more mutations identified than  
349 others.

350

## 351 **Discussion**

352 To understand the cell-type-specific mechanisms of NDDs across neurodevelopmental stages, we  
353 analyzed the co-expression enrichment patterns of NDD gene sets at the single-cell level. Our results  
354 demonstrate that genes that cause different NDDs indeed display distinct co-expression patterns in  
355 specific brain cell types. Detailed analyses of subtypes and cell-type transitions at various developmental  
356 stages revealed 1) novel convergent functions of dnLoF-ASD and dnMis-Epi genes in the vRG-to-IPC  
357 transition at GW10 and 2) novel convergent functions of dnMis-Epi genes in the post-mitotic interneuron  
358 maturation. Together, our study supports the hypothesis that heterogeneous genetic mutations in  
359 ASD/epilepsy converge to disrupt a small set of critical neurodevelopmental events in particular cell types,  
360 expanding our understanding of NDD pathophysiology and stepping towards comprehensive cell maps in  
361 neuropsychiatric disorders (Willsey et al. 2018). Our study also presents a computational framework for  
362 analyzing disease pathophysiology using scRNA-seq datasets.

363

### 364 **NDD pathophysiology depends on types of genetic perturbations**

365 When analyzing the NDD gene sets, we found that for the same disorder, genes with different  
366 types of mutations display distinct co-expression patterns. For instance, dnLoF-ASD genes have the  
367 highest co-expression enrichment in NPCs among all the NDD gene sets, but dnMis-ASD genes barely  
368 show any enrichment. Instead, dnLoF-Epi genes have the minimum co-expression enrichment in  
369 interneurons, while dnMis-Epi genes have the highest enrichment in the same cell type. The exact causes  
370 of these observations are not immediately clear. One potential explanation is that haploinsufficiency is the  
371 major genetic mechanism for highly penetrant ASD genes. Conversely, gain-of-function or dominant-  
372 negative missense mutations dominate the mutational spectrum of highly penetrant genes in epilepsy.  
373 Several lines of evidence support this hypothesis: 1) 43% of dnLoF mutations but only 13% of dnMis

374 mutations contribute to ASD diagnosis (Iossifov et al. 2014); 2) dnMis variants explain a larger  
375 proportion of individuals with epilepsy than of individuals with ID (Hamdan et al. 2017), and NDD  
376 individuals with dnMis variants are more likely to have epilepsy than individuals with dnLoF variants  
377 (Heyne et al. 2018); 3) Dozens of dominant-negative or gain-of-function missense mutations have been  
378 reported in epilepsy (Yuan et al. 2014; Nava et al. 2014; Orhan et al. 2014; Veeramah et al. 2012; Barcia  
379 et al. 2012; Lemke et al. 2014; Li et al. 2016b); 4) At the individual gene level, missense variants in  
380 *SCN2A* and *SCN8A* are more strongly implicated in epilepsy than LoF variants (Heyne et al. 2018), and  
381 while gain-of-function variants in *SCN2A* contribute to seizure, all ASD-associated variants dampen or  
382 eliminate channel function (Ben-Shalom et al. 2017). Nonetheless, whether this hypothesis holds true will  
383 require further, more comprehensive investigation.

384

### 385 **NPCs and their cell-type transition in ASD and epilepsy**

386 Another interesting finding is the difference in co-expression patterns within a cell type and  
387 during the cell-type transition. We found that both dnLoF-ASD and dnMis-Epi genes are more strongly  
388 co-expressed in the whole NPC population than within vRG cells or IPCs alone at GW10. Thus, these  
389 genes are less likely to cooperatively function statically in the stemness maintenance or proliferation of  
390 vRG cells or IPCs, but convergently play a critical role in the dynamic process of the vRG-to-IPC  
391 transition. Consistent with this, most dnLoF-ASD and dnMis-Epi genes, together with other genes critical  
392 for neural differentiation, concurrently increase their expression during this transition. Without  
393 transcriptomic data at the single-cell level, this kind of subpopulation analysis would be very difficult if  
394 not impossible.

395 The involvement of the vRG-to-IPC transition is interesting. vRG cells are located within the  
396 ventricular zone adjacent to the ventricles (Kriegstein and Alvarez-Buylla 2009). vRG cells undergo  
397 either symmetric division to proliferate and expand the radial glia pool or asymmetric division to generate  
398 neurons or IPCs. IPCs migrate out of the ventricular zone to form the SVZ at the basal side. There, they  
399 undergo limited rounds of divisions to produce multiple neurons. It is suggested that this two-step pattern

400 of neurogenesis plays a critical role in the amplification of cell numbers underlying cerebral cortex  
401 expansion (Martínez-Cerdeño et al. 2006; Kriegstein et al. 2006). In addition, a perturbation in radial glia  
402 cells or IPCs results in abnormal neuron production and cortical malfunction (Krogan et al. 2016;  
403 Gompers et al. 2017; Li et al. 2016a; Shenhav et al. 2012). Beyond that, IPCs play an important role in  
404 neuronal subtype specification. IPCs, dependent on the time when they are produced, acquire specific  
405 neuronal subtype identity and differentially generate cortical layers in a timely manner (Daza et al. 2016).  
406 Moreover, the morphological and electrophysiological properties of upper-layer neurons are dependent on  
407 their origins from radial glia cells or IPCs (Haydar et al. 2015). Thus, the transition from vRG cells to  
408 IPCs has a strong impact on the specificity and function of both the IPCs and the neuronal progeny to be  
409 generated.

410 We found that both ASD and epilepsy genes have higher co-expression enrichment in NPCs than  
411 in excitatory neurons. However, their expression levels are higher in excitatory neurons than in NPCs.  
412 These findings indicate that at the individual gene level, ASD and epilepsy genes generally become more  
413 abundant and potentially function more importantly in young excitatory neurons. However, their  
414 functions become more diverse and less convergent in young excitatory neurons as demonstrated by a  
415 reduction in co-expression enrichment. Thus, NPCs are likely a more critical convergent point for ASD  
416 and epilepsy compared with young excitatory neurons, which could be missed by expression-based  
417 analysis (Satterstrom et al. 2020).

418

#### 419 **Similar but different roles of ASD versus epilepsy genes during the NPC transition at GW10**

420 We found that ASD genes regulate the transcription of other genes in neural differentiation  
421 pathways to promote the NPC transition at GW10. On the other hand, epilepsy genes themselves are  
422 downstream effectors controlled by upstream regulators. A mutation in a single ion channel downstream  
423 of the differentiation program might severely affect one electrophysiological property of the IPCs, but a  
424 mutation in a transcription regulator upstream of the differentiation program could broadly and  
425 moderately affect multiple aspects of the cell, such as proliferation, specification, and maturation. Some

426 ASD genes, like *CHD8*, might also determine whether to initiate the transition and/or regulate the balance  
427 of NPC proliferation and differentiation at the early stage of the transition. LoF mutations in this kind of  
428 genes would promote NPC proliferation at the expense of neural differentiation and cause early brain  
429 overgrowth in ASD (Courchesne et al. 2007, 2019; Ernst 2016; Gompers et al. 2017). Some upstream  
430 regulators may not only regulate the transition but also specifically control downstream processes related  
431 to epilepsy. Mutations in these regulators could lead to both ASD and epilepsy, which may be one reason  
432 for such a high comorbidity rate between the two disorders (Sundelin et al. 2016; Betancur 2011).

433

#### 434 **An omnigenic model for ASD and epilepsy**

435 The genetic landscapes of ASD and epilepsy are complex and far from completely understood (de  
436 la Torre-Ubieta et al. 2016; Cross et al. 2015; Vorstman et al. 2017). With the application of next-  
437 generation sequencing and SNP arrays, genetic variations that contribute to the etiology of a number of  
438 cases have been uncovered. Still, in most cases, the genetic causes remain unclear. Recently, a new  
439 inheritance model for complex diseases—omnigenic inheritance has been proposed (Boyle et al. 2017). In  
440 this model, it is suggested that several “core” disease-related genes are responsible for the disease  
441 phenotype while all other “peripheral” genes contribute to the phenotype by affecting the functions of  
442 these core genes. Due to evolutionary pressure, only a limited number of large-effect genetic variations in  
443 core genes can be identified and a large fraction of the total genetic contribution to disease comes from  
444 peripheral genes that do not play direct roles. A possible approach to identify core genes is to look for *de*  
445 *novo* rare variants with large effect sizes. This model fits well with our observations that potential core  
446 genes with multiple *de novo* rare variants in ASD and epilepsy are clustered at the more central position  
447 in the co-expression network of relevant cell types while genes with fewer mutations tend to be in the  
448 peripheral region. We noted that another kind of core gene which may function equally importantly  
449 across cell types/stages/transitions should not be overlooked. Thus, our study not only provides a list of  
450 core genes (such as ASD and epilepsy genes with high co-expression degree in **Supplementary Table**  
451 **S7E,F**) and pathways but also identifies the most relevant cell types where these genes and pathways

452 exhibit convergent function. Future investigations focusing on these core genes and their related  
453 regulatory pathways in the most relevant cell types and developmental stages would accelerate NDD gene  
454 discovery and enable a more comprehensive understanding of NDD pathophysiology. Development of  
455 precise therapies targeting these convergent mechanisms would benefit groups of individuals with NDDs  
456 (Sztainberg and Zoghbi 2016; Ernst 2016; Sestan and State 2018; Pang et al. 2014).

457

#### 458 **Robustness of co-expression enrichment analysis**

459 Our co-expression enrichment analysis is not affected by confounding factors, such as co-  
460 expression threshold, correlation-based measures of association, gene set size, gene expression level, and  
461 severity of missense mutations. However, we found that sample size correlates with co-expression  
462 enrichment score, and larger cell numbers tend to give higher co-expression enrichment score of an NDD  
463 gene set. Based on our observation and the previous finding that larger cell numbers facilitate the  
464 reconstruction of more robust and coherent networks (Skinnider et al. 2019), we suggest that controlling  
465 for sample size difference be established as a standard for co-expression comparison analysis across  
466 different conditions. For the previous conclusions based on co-expression comparison analyses across  
467 different conditions without controlling for sample size difference (Willsey et al. 2013; Lin et al. 2015),  
468 sample sizes vary across conditions and thus evaluation of sample size effect is probably needed. The  
469 potential sample size effect also exists when combining different conditions to construct a global co-  
470 expression network, because the signal would be dominated by the conditions with larger sample sizes.  
471 Although we used percentile-based cutoff for co-expression enrichment analysis to mitigate the effect of  
472 global co-expression differences across cell types, the findings are consistent with results from the  
473 absolute correlation analysis. The high co-expression enrichment score also reflects the absolute elevation  
474 of co-expression level, especially for dnLoF-ASD genes in NPCs (**Supplementary Fig. S12A**), dnMis-  
475 Epi genes in interneurons (**Supplementary Fig. S12B**), dnLoF-ASD and dnMis-Epi genes in NPCs at  
476 GW10 and GW16 (**Supplementary Fig. S16A**), and dnLoF-ASD and dnMis-Epi genes in the vRG-to-

477 IPC transition at GW10 (**Supplementary Fig. S18A**). Lastly, it is worth noting that the relatively small  
478 sample size has limited our analysis to a few cell types and developmental stages. Besides, we are using  
479 the scRNA-seq dataset from the mid-fetal stage of the developing human brain and our analyses primarily  
480 focus on early mechanisms of NDDs, that is, transcriptional programs and cell-autonomous effects that  
481 take place early in brain development. In the future, it could be fruitful to expand our analysis to more cell  
482 types and developmental stages at both cell-autonomous and cell-cell interaction levels when larger  
483 scRNA-seq datasets which also cover later developmental stages become available.

484

## 485 **Methods**

### 486 **High-confidence NDD gene sets**

487 We downloaded *de novo* mutation data for four NDDs: ASD, epilepsy, ID, and DD from the  
488 denovo-db v.1.5 database release (Turner et al. 2017) (<http://denovo-db.gs.washington.edu>). For epilepsy,  
489 we also added *de novo* mutation data which were not included in the denovo-db v.1.5 database release  
490 from two studies (EuroEPINOMICS-RES Consortium et al. 2017; Heyne et al. 2018). We extracted genes  
491 with dnLoF (nonsense, frameshift, and canonical splice site) and dnMis mutations from whole-exome or -  
492 genome sequencing data for these four NDDs. The number of dnLoF (dnMis) mutations for a gene in a  
493 disorder was defined as the number of distinct individuals with the disorder harboring dnLoF (dnMis)  
494 mutations in the gene. High-confidence dnLoF (dnMis) genes for ASD, epilepsy, ID, and DD were  
495 defined as genes with at least three dnLoF (dnMis) mutations in each disorder. For high-confidence gene  
496 sets with gene number less than 20 (dnLoF-Epi, dnLoF-ID, dnMis-Epi, and dnMis-ID), we used genes  
497 with at least two *de novo* mutations. For comparison, we used genes with at least one dnLoF mutations in  
498 unaffected ASD siblings in the denovo-db database as sibling control. We also used genes with at least  
499 one LoF mutations in the ExAC database (Lek et al. 2016) with known neuropsychiatric cohorts removed  
500 as general control. We further included Brain-GRF and synapse genes as controls for genes functioning in  
501 the brain. The Brain-GRF gene set is a list of gene regulatory factors that are known to function in the  
502 human brain from literature curation (Berto et al. 2016). The synapse gene set was obtained from the



503 SynGO knowledge base (Koopmans et al. 2019). The SFARI ASD gene set was obtained from the SFARI  
504 Gene database (Basu et al. 2009), and the SFARI ASD genes were grouped into syndromic genes  
505 (category S) and genes with different evidence levels (categories 1-6; high confidence-low evidence). In  
506 addition, we assessed whether pathogenicity metrics such as CADD score (Kircher et al. 2014) could  
507 improve NDD gene sets with dnMis mutations. We focused on ASD and DD genes with a large number  
508 of dnMis mutations available and obtained two high-confidence gene sets: ASD gene sets harboring at  
509 least two dnMis mutations with CADD score>25, and DD gene sets harboring at least three dnMis  
510 mutations with CADD score>25.

### 511 **Processing of scRNA-seq data**

512 The human fetal prefrontal cortical scRNA-seq data (Zhong et al. 2018) used in this study were  
513 downloaded from the Gene Expression Omnibus under the accession number GSE104276. The transcript  
514 counts of each cell were normalized to transcript per million (TPM), where TPM is the transcript count of  
515 each gene divided by the total transcript counts of the cell and multiplied by one million. The gene-level  
516 TPM expression values were further transformed to  $\log_2(TPM + 1)$  values. Based on the sample  
517 annotation file, cells were first divided into six major cell types: NPCs, excitatory neurons, interneurons,  
518 astrocytes, OPCs, and microglia. For each cell type, genes with expression level >0 in at least 10% of  
519 cells for the cell type were defined as genes expressed in the cell type. Samples in each major cell type  
520 were further divided into cell stages based on developmental time points, and only the cell stages  
521 containing at least 50 samples were used for analysis. Only the time-matched cell stages containing at  
522 least 50 samples in both NPCs and excitatory neurons (astrocytes or OPCs) were used to study the  
523 differentiation from NPCs to excitatory neurons (astrocytes or OPCs). Samples in NPCs were further  
524 divided into three cell subtypes: vRG cells, oRG cells, and IPCs according to the clustering result of  
525 NPCs (Zhong et al. 2018), where vRG cells correspond to clusters 1, 2 and 6, oRG cells correspond to  
526 clusters 7, 8 and 9, and IPCs correspond to clusters 3, 4 and 5. Samples in excitatory neurons at GW16  
527 were also divided into three cell subclusters: Ex\_C3, Ex\_C4, and Ex\_C5 according to the clustering result  
528 of excitatory neurons (Zhong et al. 2018). The statistical significance P values that measure the

529 expression difference of layer marker genes between GW16 excitatory neuron subclusters and GW10  
530 excitatory neurons were computed using DESeq2 on un-normalized counts (Love et al. 2014). The  
531 statistical significance P values of the overlap between eight NDD gene sets were calculated by the one-  
532 sided Fisher's exact test using genes expressed in at least one major cell type as background genes.

### 533 **Construction of co-expression networks**

534 To construct a co-expression network for each of six major cell types, we used genes expressed in  
535 the cell type as background genes. We first computed the pairwise Spearman's rank correlation  
536 coefficients between background genes and sorted all the pairwise Spearman's correlation coefficients in  
537 descending order. Then, we determined the correlation threshold that gives us the top 0.5% highest  
538 pairwise Spearman's correlation coefficients. The threshold of top 0.5% is commonly used to construct  
539 co-expression networks (Lee et al. 2004; Crow et al. 2016) and the value 0.5% was defined as co-  
540 expression network density for the background genes. Next, we used the same correlation threshold to  
541 construct a co-expression network for a given gene set. For cell stages divided based on developmental  
542 time points in each major cell type, we used genes expressed in the major cell type as background genes.  
543 For three cell subtypes of NPCs: vRG cells, oRG cells, and IPCs as well as their transitions, we used  
544 genes expressed in NPCs as background genes. Genes expressed in either NPCs or excitatory neurons  
545 were defined as genes expressed in the NPC-to-excitatory neuron differentiation and used as background  
546 genes for the differentiation. The co-expression degree of a gene in the co-expression network is the  
547 number of genes co-expressed with the gene. All the co-expression networks were visualized using  
548 Cytoscape (Shannon et al. 2003).

### 549 **Co-expression enrichment analysis**

550 When constructing a co-expression network for the background genes in one cell type, the value  
551 0.5% used for selection of correlation threshold was defined as co-expression network density for the  
552 background genes. Similarly, the co-expression network density for a gene set was defined as the number  
553 of significant co-expressed pairs divided by the number of all pairs between genes in the gene set. Then,  
554 the co-expression fold enrichment score for the gene set was defined as the ratio of the co-expression

555 network density for the gene set to the co-expression network density for the background genes. The  
556 statistical significance of the co-expression fold enrichment score of the gene set was assessed in two  
557 ways. First, we compared the co-expression network density for the gene set against the co-expression  
558 network density for the background genes by the one-sided Fisher's exact test with R function:

$$fisher.test\left(\begin{pmatrix} A & B - A \\ C & D - C \end{pmatrix}, alternative = "greater"\right)$$

559 where A is the number of significant co-expressed pairs between genes in the gene set, B is the number of  
560 all pairs between genes in the gene set, C is the number of significant co-expressed pairs between the  
561 background genes, and D is the number of all pairs between the background genes. Second, we also  
562 assessed the statistical significance of the co-expression fold enrichment score of the gene set by  
563 comparing whether the gene set has a higher co-expression fold enrichment score than the other NDD  
564 gene sets. Similarly, the one-sided Fisher's exact test was used to compute the statistical significance of  
565 the comparison of the co-expression network density for the gene set against the co-expression network  
566 density for another NDD gene set.

### 567 **Co-expression enrichment analysis by downsampling**

568 Six major cell types have different sample sizes, and microglia has the minimum sample size (68  
569 cells). For fair comparison across the major cell types, we downsampled the same number of cells (68  
570 cells) 1000 times for NPCs, excitatory neurons, interneurons, astrocytes, and OPCs to calculate co-  
571 expression fold enrichment score. For fair comparison across the cell stages of the major cell types, we  
572 downsampled the same number of cells (50 cells) 1000 times for each cell stage to calculate a co-  
573 expression fold enrichment score. During the cell-type transition or differentiation between one cell type  
574 with a smaller cell number and the other cell type with a larger cell number, we downsampled the smaller  
575 number of cells 1000 times for the cell type with a larger cell number to calculate co-expression fold  
576 enrichment score. For the combined cell types, we downsampled half of the smaller number of cells for  
577 the cell type with a smaller cell number and half of the smaller number of cells for the cell type with a  
578 larger cell number. We then combined the two downsampled cell types and repeated 1000 times to

579 calculate the co-expression fold enrichment score for the combined cell types. To calculate the  
580 distribution of average Spearman's correlation coefficients of an NDD gene set for each condition by  
581 downsampling, the pairwise Spearman's rank correlation coefficients within an NDD gene set were  
582 averaged and repeated 1000 times.

### 583 **Co-expression enrichment analysis by controlling for different factors**

584 In addition to using the threshold of top 0.5% to construct co-expression networks and calculate  
585 co-expression fold enrichment score for NDD gene sets in six major cell types, we used different  
586 thresholds of top 0.25% and top 1%. We also varied the thresholds between top 0.1% and top 5% to  
587 construct co-expression networks and calculate co-expression fold enrichment score for dnLoF-ASD  
588 genes in NPCs and dnMis-Epi genes in interneurons. In addition to using Spearman's correlation to  
589 construct co-expression networks and calculate co-expression fold enrichment score at the threshold of  
590 top 0.5% for dnLoF-ASD genes in NPCs and dnMis-Epi genes in interneurons, we used another 16  
591 measures of association implemented in the 'dismay' R package (Skinnider et al. 2019). Moreover, we  
592 assessed the effect of gene set size difference on the co-expression fold enrichment score of NDD and  
593 control gene sets in six major cell types. For each major cell types, we first determined the smallest gene  
594 set size of NDD and control gene sets with genes expressed in the cell type. We then downsampled the  
595 same number of genes (the smallest gene set size) 1000 times for each gene set to calculate the co-  
596 expression fold enrichment score. We further evaluated the dependence of gene expression on the co-  
597 expression fold enrichment score of NDD gene sets in six major cell types. For each major cell type,  
598 genes expressed in the cell type were divided into ten bins based on expression level with each bin  
599 containing the equal number of genes. For each gene set in each cell type, the co-expression enrichment  
600 score was computed using 1000 randomly chosen same-size gene sets with the same expression  
601 distribution across bins in the cell type as the background gene set.

### 602 **Correlation with dnLoF-ASD and dnMis-Epi genes**

603 For the calculation of correlation with dnLoF-ASD genes in NPCs, we used genes expressed in  
604 NPCs as background genes. For any non-dnLoF-ASD gene expressed in NPCs, the correlation with

605 dnLoF-ASD genes for the gene was defined as the average Spearman's correlation coefficients between  
606 the gene and dnLoF-ASD genes. For any dnLoF-ASD gene expressed in NPCs, the correlation with  
607 dnLoF-ASD genes for the gene was defined as the average Spearman's correlation coefficients between  
608 the gene and the other dnLoF-ASD genes. Based on the correlation with dnLoF-ASD genes for any gene  
609 expressed in NPCs, we then obtained the distribution of correlations with dnLoF-ASD genes for different  
610 types of mutated ASD genes. The differences in correlations between different ASD gene sets were  
611 estimated using the one-sided Wilcoxon rank sum test. A similar analysis was performed to compute the  
612 correlation with dnLoF-ASD genes during the transition from vRG cells to IPCs at GW10 using genes  
613 expressed in NPCs as background genes. A similar analysis was performed to compute the correlation  
614 with dnMis-Epi genes in interneurons and the transition from vRG cells to IPCs at GW10 using genes  
615 expressed in interneurons and NPCs as background genes, respectively.

#### 616 **GO enrichment analysis of dnLoF-ASD and dnMis-Epi genes**

617 To perform GO enrichment analysis, the ontology and human annotation files were downloaded  
618 from the GO database (<http://www.geneontology.org>). To compute the overlap between dnLoF-ASD  
619 genes and GO biological process terms during the transition from vRG cells to IPCs at GW10, we used  
620 genes expressed in NPCs as background genes. Genes that are annotated under the GO terms but not  
621 expressed in NPCs were removed. Only GO terms with the remaining gene number between 10 and 1000  
622 after filtering were used for GO enrichment analysis. The statistical significance P values of the overlap  
623 between dnLoF-ASD genes and GO terms were computed using the one-sided Fisher's exact test and  
624 corrected for multiple hypothesis testing using false discovery rate (FDR) control procedure (Benjamini  
625 and Hochberg 1995). For GO enrichment analysis of dnMis-Epi genes, the same process above was  
626 repeated.

#### 627 **GO correlation analysis of dnLoF-ASD and dnMis-Epi genes during the cell-type transition**

628 Based on the correlation with dnLoF-ASD genes during the vRG-to-IPC transition at GW10 for  
629 any gene expressed in NPCs, we then obtained the distribution of correlations with dnLoF-ASD genes  
630 during the transition for genes annotated under a GO biological process term. Only GO terms with the

631 remaining gene number between 10 and 1000 after filtering by genes expressed in NPCs were used. Then,  
632 we computed the statistical significance P value which measures whether genes annotated under the GO  
633 term have higher correlations than the background genes (genes expressed in NPCs) by the one-sided  
634 Wilcoxon rank sum test. We used this P value to measure how significantly the GO term is positively  
635 correlated with dnLoF-ASD genes during the vRG-to-IPC transition. We also computed the statistical  
636 significance P value which measures whether genes annotated under the GO term have lower correlations  
637 than the background genes (genes expressed in NPCs) by the one-sided Wilcoxon rank sum test. We used  
638 this P value to measure how significantly the GO term is negatively correlated with dnLoF-ASD genes in  
639 the vRG-to-IPC transition. The P values for all GO terms from GO positive or negative correlation  
640 analysis of dnLoF-ASD genes during the transition were adjusted using the Benjamini and Hochberg  
641 method. For GO correlation analysis of dnMis-Epi genes during the vRG-to-IPC transition, the same  
642 process above was repeated.

#### 643 **Expression change of dnLoF-ASD and dnMis-Epi genes during cell-type transitions**

644 To compute the  $\log_2(\text{fold change})$  value for a gene during the transition from vRG cells to IPCs  
645 at GW10, gene expression TPM values of the gene in the vRG and IPC samples at GW10 were added by  
646 1. Then, the average expression of the gene across samples in IPCs at GW10 was divided by the average  
647 expression of the gene across samples in vRG cells at GW10 and then  $\log_2$  transformed. Based on the  
648  $\log_2(\text{fold change})$  value for any gene, we then obtained the distribution of  $\log_2(\text{fold change})$  values for  
649 dnLoF-ASD or dnMis-Epi genes. Next, we computed the statistical significance P value which measures  
650 whether dnLoF-ASD or dnMis-Epi genes have higher (expression increase)  $\log_2(\text{fold change})$  values than  
651 the background genes (genes expressed in NPCs) during the transition by the one-sided Wilcoxon rank  
652 sum test. A similar analysis was performed to compute the statistical significance of expression change  
653 for dnLoF-ASD and dnMis-Epi genes during the differentiation at GW10 from NPCs, vRG, and IPCs to  
654 excitatory neurons, and during the differentiation at GW16 from NPCs, vRG, oRG, and IPCs to excitatory  
655 neurons.

#### 656 **GO expression change analysis during the cell-type transition**

657           Based on the  $\log_2(\text{fold change})$  value for any gene during the transition from vRG cells to IPCs at  
658 GW10, we then obtained the distribution of  $\log_2(\text{fold change})$  values for genes annotated under a GO  
659 biological process term. Only GO terms with the remaining gene number between 10 and 1000 after  
660 filtering by genes expressed in NPCs were used. Then, we computed the statistical significance P value  
661 which measures whether genes annotated under the GO term have higher (expression increase) or lower  
662 (expression decrease)  $\log_2(\text{fold change})$  values than the background genes (genes expressed in NPCs) by  
663 the one-sided Wilcoxon rank sum test. The P values for all GO terms from GO expression change  
664 analysis during the transition were adjusted using the Benjamini and Hochberg method.

### 665 ***CHD8* target gene analyses**

666           The analytic results of *Chd8* haploinsufficiency mice RNA-seq data were obtained from  
667 Supplementary Table S3 of the study (Gompers et al. 2017). Only genes in the *Chd8* RNA-seq data (with  
668 gene *CHD8* removed) that are also expressed in NPCs in the human cortical scRNA-seq data were  
669 defined as background genes for *CHD8* target gene analyses. The top 300 downregulated and top 300  
670 upregulated genes based on  $\log_2(\text{fold change})$  values in *Chd8* haploinsufficiency versus wild-type mice at  
671 each developmental stage were defined as *CHD8*-activated and -repressed genes, respectively. *CHD8*-  
672 bound genes are genes whose promoters are bound by *Chd8* in adult mouse forebrain identified using  
673 ChIP-seq (Gompers et al. 2017). To compute the overlap between *CHD8*-activated/-repressed genes and  
674 *CHD8*-bound genes, we only used *CHD8*-bound genes that are also in the background gene set. The  
675 statistical significance P values of the overlap between *CHD8*-activated/-repressed genes and *CHD8*-  
676 bound genes were computed using the one-sided Fisher's exact test. To compute the overlap between  
677 *CHD8*-activated/-repressed genes and ASD genes with at least one dnLoF mutations, we only used ASD  
678 genes that are also in the background gene set. The statistical significance P values of the overlap between  
679 *CHD8*-activated/-repressed genes and ASD genes were computed using the one-sided Fisher's exact test.  
680 Based on the  $\log_2(\text{fold change})$  value for any gene during the transition from vRG cells to IPCs at GW10,  
681 we then obtained the distribution of  $\log_2(\text{fold change})$  values for *CHD8*-activated or -repressed target  
682 genes. Then, we computed the statistical significance P values which measure whether *CHD8*-activated (-



683 repressed) target genes have higher (lower)  $\log_2(\text{fold change})$  values than the background genes during  
684 the transition by the one-sided Wilcoxon rank sum test. Next, we computed the Spearman's correlation  
685 coefficient between any background gene and *CHD8* during the transition from vRG cells to IPCs at  
686 GW10 and obtained the distribution of correlations with *CHD8* for *CHD8*-activated or -repressed target  
687 genes. We then computed the statistical significance P values which measure whether *CHD8*-activated (-  
688 repressed) target genes have higher (lower) correlations with *CHD8* than the background genes during the  
689 transition by the one-sided Wilcoxon rank sum test. To compute the overlap between *CHD8*-activated/-  
690 repressed target genes and GO biological process terms, we only used GO terms with the remaining gene  
691 number between 10 and 1000 after filtering by the background genes. The statistical significance P values  
692 of the overlap between *CHD8*-activated/-repressed target genes and GO terms were computed using the  
693 one-sided Fisher's exact test.

#### 694 **Code availability**

695 Code used in this study is available as **Supplementary Code**.

696

#### 697 **Acknowledgments**

698 We thank Shu Zhang and Fuchou Tang for kindly sharing the detailed clustering result of cell subtypes,  
699 which can be downloaded now from the Gene Expression Omnibus under the accession number  
700 GSE104276. We thank Mingshan Xue, Dmitry Velmeshev, Hyun-Hwan Jeong, and Ying-Wooi Wan for  
701 valuable discussions. This work has been supported by National Institute of General Medical Sciences  
702 R01-GM120033, National Science Foundation–Division of Mathematical Sciences DMS-1263932,  
703 Cancer Prevention and Research Institute of Texas RP170387, Houston Endowment, the Hamill  
704 Foundation, and Chao Family Foundation (Z.L.), Huffington Foundation, Howard Hughes Medical  
705 Institute (H.Y.Z.). L.W. was supported by a predoctoral fellowship from Autism Speaks (#9120).

706

#### 707 **Author contributions**



708 K.P., L.W., H.Y.Z., and Z.L. conceived of and designed the study. K.P. performed analyses. All the  
709 authors interpreted the results. K.P., L.W., H.Y.Z., and Z.L. wrote the manuscript with input from W.W.,  
710 J.Z., C.C., and K.H..

711

## 712 **References**

- 713 Allen AS, Berkovic SF, Cossette P, Delanty N, Dlugos D, Eichler EE, Epstein MP, Glauser T,  
714 Goldstein DB, Han Y, et al. 2013. De novo mutations in epileptic encephalopathies. *Nature*  
715 **501**: 217–221. <http://dx.doi.org/10.1038/nature12439>.
- 716 Anttila V, Bulik-Sullivan B, Finucane HK, Walters RK, Bras J, Duncan L, Escott-Price V,  
717 Falcone GJ, Gormley P, Malik R, et al. 2018. Analysis of shared heritability in common  
718 disorders of the brain. *Science (80- )* **360**.
- 719 Arnsten AFT. 2006. Fundamentals of attention-deficit/hyperactivity disorder: circuits and  
720 pathways. *J Clin Psychiatry* **67 Suppl 8**: 7–12. [http://doi.wiley.com/10.1111/j.1545-  
721 5300.2007.00199.x](http://doi.wiley.com/10.1111/j.1545-5300.2007.00199.x).
- 722 Barcia G, Fleming MR, Deligniere A, Gazula V-R, Brown MR, Langouet M, Chen H,  
723 Kronengold J, Abhyankar A, Cilio R, et al. 2012. De novo gain-of-function KCNT1 channel  
724 mutations cause malignant migrating partial seizures of infancy. *Nat Genet* **44**: 1255–1259.  
725 <http://www.nature.com/articles/ng.2441>.
- 726 Basu SN, Kollu R, Banerjee-Basu S. 2009. AutDB: A gene reference resource for autism  
727 research. *Nucleic Acids Res* **37**: 832–836.
- 728 Ben-Shalom R, Keeshen CM, Berrios KN, An JY, Sanders SJ, Bender KJ. 2017. Opposing  
729 Effects on NaV1.2 Function Underlie Differences Between SCN2A Variants Observed in  
730 Individuals With Autism Spectrum Disorder or Infantile Seizures. *Biol Psychiatry* **82**: 224–  
731 232. <http://dx.doi.org/10.1016/j.biopsych.2017.01.009>.
- 732 Benjamini Y, Hochberg Y. 1995. Controlling the False Discovery Rate: A Practical and  
733 Powerful Approach to Multiple Testing. *J R Stat Soc* **57**: 289–300.
- 734 Bernier R, Golzio C, Xiong B, Stessman HA, Coe BP, Penn O, Witherspoon K, Gerdtts J, Baker  
735 C, Vulto-Van Silfhout AT, et al. 2014. Disruptive CHD8 mutations define a subtype of  
736 autism early in development. *Cell* **158**: 263–276.  
737 <http://dx.doi.org/10.1016/j.cell.2014.06.017>.
- 738 Berto S, Perdomo-Sabogal A, Gerighausen D, Qin J, Nowick K. 2016. A Consensus network of  
739 gene regulatory factors in the human frontal lobe. *Front Genet* **7**: 1–16.
- 740 Betancur C. 2011. Etiological heterogeneity in autism spectrum disorders: More than 100 genetic  
741 and genomic disorders and still counting. *Brain Res* **1380**: 42–77.  
742 <http://dx.doi.org/10.1016/j.brainres.2010.11.078>.
- 743 Boyle EA, Li YI, Pritchard JK. 2017. An Expanded View of Complex Traits: From Polygenic to  
744 Omnigenic. *Cell* **169**: 1177–1186. <http://dx.doi.org/10.1016/j.cell.2017.05.038>.
- 745 C Yuen RK, Merico D, Bookman M, L Howe J, Thiruvahindrapuram B, Patel R V, Whitney J,  
746 Deflaux N, Bingham J, Wang Z, et al. 2017. Whole genome sequencing resource identifies  
747 18 new candidate genes for autism spectrum disorder. *Nat Neurosci* **20**: 602–611.  
748 <http://www.ncbi.nlm.nih.gov/pubmed/28263302>.
- 749 Chang J, Gilman SR, Chiang AH, Sanders SJ, Vitkup D. 2015. Genotype to phenotype

- 750 relationships in autism spectrum disorders. *Nat Neurosci* **18**: 191–198.
- 751 Courchesne E, Pierce K, Schumann CM, Redcay E, Buckwalter JA, Kennedy DP, Morgan J.  
752 2007. Mapping early brain development in autism. *Neuron* **56**: 399–413.  
753 <http://www.ncbi.nlm.nih.gov/pubmed/17964254>.
- 754 Courchesne E, Pramparo T, Gazestani VH, Lombardo M V., Pierce K, Lewis NE. 2019. The  
755 ASD Living Biology: from cell proliferation to clinical phenotype. *Mol Psychiatry* **24**: 88–  
756 107. <http://dx.doi.org/10.1038/s41380-018-0056-y>.
- 757 Cross JH, Scheffer IE, McTague A, Kurian MA, Howell KB. 2015. The genetic landscape of the  
758 epileptic encephalopathies of infancy and childhood. *Lancet Neurol* **15**: 304–316.  
759 [http://dx.doi.org/10.1016/S1474-4422\(15\)00250-1](http://dx.doi.org/10.1016/S1474-4422(15)00250-1).
- 760 Crow M, Paul A, Ballouz S, Huang ZJ, Gillis J. 2016. Exploiting single-cell expression to  
761 characterize co-expression replicability. *Genome Biol* **17**: 101.  
762 <http://dx.doi.org/10.1186/s13059-016-0964-6>.
- 763 Daza RAM, Arnold SJ, Ramos-Laguna KA, Elsen GE, Hevner RF, Bedogni F, Mihalas AB.  
764 2016. Intermediate Progenitor Cohorts Differentially Generate Cortical Layers and Require  
765 Tbr2 for Timely Acquisition of Neuronal Subtype Identity. *Cell Rep* **16**: 92–105.  
766 <http://dx.doi.org/10.1016/j.celrep.2016.05.072>.
- 767 de la Torre-Ubieta L, Won H, Stein JL, Geschwind DH. 2016. Advancing the understanding of  
768 autism disease mechanisms through genetics. *Nat Med* **22**: 345–61.  
769 <http://www.nature.com/doi/10.1038/nm.4071>  
770 <http://www.ncbi.nlm.nih.gov/pubmed/27050589>.
- 771 de Ligt J, Willemsen MH, van Bon BWM, Kleefstra T, Yntema HG, Kroes T, Vulto-van Silfhout  
772 AT, Koolen DA, de Vries P, Gilissen C, et al. 2012. Diagnostic Exome Sequencing in  
773 Persons with Severe Intellectual Disability. *N Engl J Med* **367**: 1921–1929.  
774 <http://www.nejm.org/doi/abs/10.1056/NEJMoa1206524>.
- 775 De Rubeis S, He X, Goldberg AP, Poultney CS, Samocha K, Ercument Cicek A, Kou Y, Liu L,  
776 Fromer M, Walker S, et al. 2014. Synaptic, transcriptional and chromatin genes disrupted in  
777 autism. *Nature* **515**: 209–215. <http://www.ncbi.nlm.nih.gov/pubmed/25363760>.
- 778 Deciphering Developmental Disorders Study. 2017. Prevalence and architecture of de novo  
779 mutations in developmental disorders. *Nature* **542**: 433–438.  
780 <http://www.nature.com/articles/nature21062>.
- 781 Ernst C. 2016. Proliferation and Differentiation Deficits are a Major Convergence Point for  
782 Neurodevelopmental Disorders. *Trends Neurosci* **39**: 290–299.  
783 <http://dx.doi.org/10.1016/j.tins.2016.03.001>.
- 784 EuroEPINOMICS-RES Consortium, Epilepsy Phenome/Genome Project, Epi4K Consortium.  
785 2017. De Novo Mutations in Synaptic Transmission Genes Including DNMI Cause  
786 Epileptic Encephalopathies. *Am J Hum Genet* **100**: 179.  
787 <https://linkinghub.elsevier.com/retrieve/pii/S0002929714003838>.
- 788 Fietz SA, Kelava I, Vogt J, Wilsch-Bräuninger M, Stenzel D, Fish JL, Corbeil D, Riehn A,  
789 Distler W, Nitsch R, et al. 2010. OSVZ progenitors of human and ferret neocortex are  
790 epithelial-like and expand by integrin signaling. *Nat Neurosci* **13**: 690–699.  
791 <http://dx.doi.org/10.1038/nn.2553>.
- 792 Gilman SR, Chang J, Xu B, Bawa TS, Gogos JA, Karayiorgou M, Vitkup D. 2012. Diverse types  
793 of genetic variation converge on functional gene networks involved in schizophrenia. *Nat*  
794 *Neurosci* **15**: 1723–1728.
- 795 Gompers AL, Su-Feher L, Ellegood J, Copping NA, Riyadh MA, Stradleigh TW, Pride MC,

- 796 Schaffler MD, Wade AA, Catta-Preta R, et al. 2017. Germline Chd8 haploinsufficiency  
797 alters brain development in mouse. *Nat Neurosci* **20**: 1062–1073.
- 798 Gulsuner S, Walsh T, Watts AC, Lee MK, Thornton AM, Casadei S, Rippey C, Shahin H,  
799 Nimgaonkar VL, Go RCP, et al. 2013. Spatial and Temporal Mapping of De Novo  
800 Mutations in Schizophrenia to a Fetal Prefrontal Cortical Network. *Cell* **154**: 518–529.  
801 <https://linkinghub.elsevier.com/retrieve/pii/S0092867413008313>.
- 802 Hamdan FF, Myers CT, Cossette P, Lemay P, Spiegelman D, Laporte AD, Nassif C, Diallo O,  
803 Monlong J, Cadieux-Dion M, et al. 2017. High Rate of Recurrent De Novo Mutations in  
804 Developmental and Epileptic Encephalopathies. *Am J Hum Genet* **101**: 664–685.  
805 <https://linkinghub.elsevier.com/retrieve/pii/S0002929717303774>.
- 806 Hansen D V., Lui JH, Parker PRL, Kriegstein AR. 2010. Neurogenic radial glia in the outer  
807 subventricular zone of human neocortex. *Nature* **464**: 554–561.  
808 <http://dx.doi.org/10.1038/nature08845>.
- 809 Haydar TF, Luebke JI, Medalla M, Guillamon-Vivancos T, Tyler WA. 2015. Neural Precursor  
810 Lineages Specify Distinct Neocortical Pyramidal Neuron Types. *J Neurosci* **35**: 6142–6152.
- 811 Heyne HO, Singh T, Stamberger H, Abou Jamra R, Caglayan H, Craiu D, De Jonghe P, Guerrini  
812 R, Helbig KL, Koeleman BPC, et al. 2018. De novo variants in neurodevelopmental  
813 disorders with epilepsy. *Nat Genet* **50**: 1048–1053. [http://www.nature.com/articles/s41588-](http://www.nature.com/articles/s41588-018-0143-7)  
814 [018-0143-7](http://www.nature.com/articles/s41588-018-0143-7).
- 815 Hormozdiari F, Penn O, Borenstein E, Eichler EE. 2015. The discovery of integrated gene  
816 networks for autism and related disorders. *Genome Res* **25**: 142–154.
- 817 Iossifov I, O’Roak BJ, Sanders SJ, Ronemus M, Krumm N, Levy D, Stessman HA, Witherspoon  
818 KT, Vives L, Patterson KE, et al. 2014. The contribution of de novo coding mutations to  
819 autism spectrum disorder. *Nature* **515**: 216–221. <http://www.antennahouse.com/>.
- 820 Kang HJ, Kawasawa YI, Cheng F, Zhu Y, Xu X, Li M, Sousa AMM, Pletikos M, Meyer KA,  
821 Sedmak G, et al. 2011. Spatio-temporal transcriptome of the human brain. *Nature* **478**: 483–  
822 489.
- 823 Kircher M, Witten DM, Jain P, O’Roak BJ, Cooper GM, Shendure J. 2014. A general framework  
824 for estimating the relative pathogenicity of human genetic variants. *Nat Genet* **46**: 310–5.  
825 <http://www.ncbi.nlm.nih.gov/pubmed/24487276>.
- 826 Koopmans F, van Nierop P, Andres-Alonso M, Byrnes A, Cijssouw T, Coba MP, Cornelisse LN,  
827 Farrell RJ, Goldschmidt HL, Howrigan DP, et al. 2019. SynGO: An Evidence-Based,  
828 Expert-Curated Knowledge Base for the Synapse. *Neuron* **103**: 217-234.e4.  
829 <http://www.ncbi.nlm.nih.gov/pubmed/31171447>.
- 830 Kriegstein A, Alvarez-Buylla A. 2009. The Glial Nature of Embryonic and Adult Neural Stem  
831 Cells. *Annu Rev Neurosci* **32**: 149–184.
- 832 Kriegstein A, Noctor S, Martínez-Cerdeño V. 2006. Patterns of neural stem and progenitor cell  
833 division may underlie evolutionary cortical expansion. *Nat Rev Neurosci* **7**: 883–890.  
834 [https://i.pinimg.com/736x/65/49/c7/6549c7cc1b5388f985ba955a09799563--cycle-](https://i.pinimg.com/736x/65/49/c7/6549c7cc1b5388f985ba955a09799563--cycle-evolution.jpg)  
835 [evolution.jpg](https://i.pinimg.com/736x/65/49/c7/6549c7cc1b5388f985ba955a09799563--cycle-evolution.jpg).
- 836 Krishnan A, Zhang R, Yao V, Theesfeld CL, Wong AK, Tadych A, Volfovsky N, Packer A,  
837 Lash A, Troyanskaya OG. 2016. Genome-wide prediction and functional characterization of  
838 the genetic basis of autism spectrum disorder. *Nat Neurosci* **19**: 1454–1462.  
839 <http://www.nature.com/articles/nn.4353>.
- 840 Krogan N, Bae B, Jayaraman D, Mancias JD, Harper JW, Reiter JF, Vagnoni C, Gonzalez DM,  
841 Mochida GH, Yu TW, et al. 2016. Microcephaly Proteins Wdr62 and Aspm Define a

- 842 Mother Centriole Complex Regulating Centriole Biogenesis, Apical Complex, and Cell Fate.  
843 *Neuron* **92**: 813–828. <http://dx.doi.org/10.1016/j.neuron.2016.09.056>.
- 844 Krumm N, Turner TN, Baker C, Vives L, Mohajeri K, Witherspoon K, Raja A, Coe BP,  
845 Stessman HA, He Z-X, et al. 2015. Excess of rare, inherited truncating mutations in autism.  
846 *Nat Genet* **47**: 582–588. <http://dx.doi.org/10.1038/ng.3303>.
- 847 Lado FA, Rubboli G, Capovilla P, Avanzini G, Moshé SL. 2013. Pathophysiology of epileptic  
848 encephalopathies. *Epilepsia* **54**: 6–13. <http://doi.wiley.com/10.1111/epi.12417>.
- 849 Lee HK, Hsu AK, Sajdak J, Qin J, Pavlidis P. 2004. Coexpression analysis of human genes  
850 across many microarray data sets. *Genome Res* **14**: 1085–94.  
851 <http://www.genome.org/cgi/doi/10.1101/gr.1910904>.
- 852 Lek M, Karczewski KJ, Minikel E V., Samocha KE, Banks E, Fennell T, O’Donnell-Luria AH,  
853 Ware JS, Hill AJ, Cummings BB, et al. 2016. Analysis of protein-coding genetic variation  
854 in 60,706 humans. *Nature* **536**: 285–91. <http://www.ncbi.nlm.nih.gov/pubmed/27535533>.
- 855 Lelieveld SH, Reijnders MRF, Pfundt R, Yntema HG, Kamsteeg EJ, De Vries P, De Vries BBA,  
856 Willemsen MH, Kleefstra T, Löhner K, et al. 2016. Meta-analysis of 2,104 trios provides  
857 support for 10 new genes for intellectual disability. *Nat Neurosci* **19**: 1194–1196.
- 858 Lemke JR, Hendrickx R, Geider K, Laube B, Schwake M, Harvey RJ, James VM, Pepler A,  
859 Steiner I, Hörtnagel K, et al. 2014. GRIN2B mutations in west syndrome and intellectual  
860 disability with focal epilepsy. *Ann Neurol* **75**: 147–154.  
861 <http://doi.wiley.com/10.1002/ana.24073>.
- 862 Li C, Hong S, Xu Z, Zhang N, Ye Q, Qin C-F, Liu X, Jiang Y, Shi L, Xu D. 2016a. Zika Virus  
863 Disrupts Neural Progenitor Development and Leads to Microcephaly in Mice. *Cell Stem*  
864 *Cell* **19**: 120–126. <http://dx.doi.org/10.1016/j.stem.2016.04.017>.
- 865 Li D, Yuan H, Ortiz-Gonzalez XR, Marsh ED, Tian L, McCormick EM, Kosobucki GJ, Chen W,  
866 Schulien AJ, Chiavacci R, et al. 2016b. GRIN2D Recurrent De Novo Dominant Mutation  
867 Causes a Severe Epileptic Encephalopathy Treatable with NMDA Receptor Channel  
868 Blockers. *Am J Hum Genet* **99**: 802–816.  
869 <https://linkinghub.elsevier.com/retrieve/pii/S0002929716302877>.
- 870 Lin GN, Corominas R, Lemmens I, Yang X, Tavernier J, Hill DE, Vidal M, Sebat J, Iakoucheva  
871 LM. 2015. Spatiotemporal 16p11.2 Protein Network Implicates Cortical Late Mid-Fetal  
872 Brain Development and KCTD13-Cul3-RhoA Pathway in Psychiatric Diseases. *Neuron* **85**:  
873 742–754. <https://linkinghub.elsevier.com/retrieve/pii/S0896627315000367>.
- 874 Lo-Castro A, Curatolo P. 2014. Epilepsy associated with autism and attention deficit  
875 hyperactivity disorder: Is there a genetic link? *Brain Dev* **36**: 185–193.  
876 <http://dx.doi.org/10.1016/j.braindev.2013.04.013>.
- 877 Love MI, Huber W, Anders S. 2014. Moderated estimation of fold change and dispersion for  
878 RNA-seq data with DESeq2. *Genome Biol* **15**: 550.  
879 <http://www.ncbi.nlm.nih.gov/pubmed/25516281> <http://www.pubmedcentral.nih.gov/articlerender.fcgi?artid=PMC4302049>.
- 880
- 881 Lui JH, Hansen D V., Kriegstein AR. 2011. Development and evolution of the human neocortex.  
882 *Cell* **146**: 18–36. <http://dx.doi.org/10.1016/j.cell.2011.06.030>.
- 883 Martínez-Cerdeño V, Noctor SC, Kriegstein AR. 2006. The role of intermediate progenitor cells  
884 in the evolutionary expansion of the cerebral cortex. *Cereb Cortex* **16 Suppl 1**: i152–61.  
885 <http://www.ncbi.nlm.nih.gov/pubmed/16766701>.
- 886 McCall MN, Illei PB, Halushka MK. 2016. Complex Sources of Variation in Tissue Expression  
887 Data: Analysis of the GTEx Lung Transcriptome. *Am J Hum Genet* **99**: 624–635.



- 888 <https://linkinghub.elsevier.com/retrieve/pii/S0002929716302816>.
- 889 Nava C, Dalle C, Rastetter A, Striano P, de Kovel CGF, Nabbout R, Cancès C, Ville D, Brilstra  
890 EH, Gobbi G, et al. 2014. De novo mutations in HCN1 cause early infantile epileptic  
891 encephalopathy. *Nat Genet* **46**: 640–645. <http://www.nature.com/articles/ng.2952>.
- 892 Noctor SC, Martinez-Cerdeño V, Ivic L, Kriegstein AR. 2004. Cortical neurons arise in  
893 symmetric and asymmetric division zones and migrate through specific phases. *Nat*  
894 *Neurosci* **7**: 136–144.
- 895 Noebels J. 2015. Pathway-driven discovery of epilepsy genes. *Nat Neurosci* **18**: 344–350.
- 896 Nowakowski TJ, Pollen AA, Sandoval-Espinosa C, Kriegstein AR. 2016. Transformation of the  
897 Radial Glia Scaffold Demarcates Two Stages of Human Cerebral Cortex Development.  
898 *Neuron* **91**: 1219–1227. <http://dx.doi.org/10.1016/j.neuron.2016.09.005>.
- 899 Orhan G, Bock M, Schepers D, Ilina EI, Reichel SN, Löffler H, Jezutkovic N, Weckhuysen S,  
900 Mandelstam S, Suls A, et al. 2014. Dominant-negative effects of KCNQ2 mutations are  
901 associated with epileptic encephalopathy. *Ann Neurol* **75**: 382–394.  
902 <http://doi.wiley.com/10.1002/ana.24080>.
- 903 Pang K, Wan Y-W, Choi WT, Donehower LA, Sun J, Pant D, Liu Z. 2014. Combinatorial  
904 therapy discovery using mixed integer linear programming. *Bioinformatics* **30**: 1456–1463.  
905 <https://academic.oup.com/bioinformatics/article-lookup/doi/10.1093/bioinformatics/btu046>.
- 906 Parikshak NN, Luo R, Zhang A, Won H, Lowe JK, Chandran V, Horvath S, Geschwind DH.  
907 2013. Integrative functional genomic analyses implicate specific molecular pathways and  
908 circuits in autism. *Cell* **155**: 1008–21. <http://www.ncbi.nlm.nih.gov/pubmed/24267887>.
- 909 Rauch A, Wieczorek D, Graf E, Wieland T, Ende S, Schwarzmayr T, Albrecht B, Bartholdi D,  
910 Beygo J, Di Donato N, et al. 2012. Range of genetic mutations associated with severe non-  
911 syndromic sporadic intellectual disability: An exome sequencing study. *Lancet* **380**: 1674–  
912 1682.
- 913 Ronan JL, Wu W, Crabtree GR. 2013. From neural development to cognition: Unexpected roles  
914 for chromatin. *Nat Rev Genet* **14**: 347–359.
- 915 Sanders SJ, He X, Willsey AJ, Devlin B, Roeder K, State MW, Sanders SJ, He X, Willsey AJ,  
916 Ercan-sencicek AG, et al. 2015. Insights into Autism Spectrum Disorder Genomic  
917 Architecture and Biology from 71 Risk Loci Article Insights into Autism Spectrum  
918 Disorder Genomic Architecture and Biology from 71 Risk Loci. *Neuron* **87**: 1215–1233.  
919 <http://dx.doi.org/10.1016/j.neuron.2015.09.016>.
- 920 Satterstrom FK, Kosmicki JA, Wang J, Breen MS, De Rubeis S, An J-Y, Peng M, Collins R,  
921 Grove J, Klei L, et al. 2020. Large-Scale Exome Sequencing Study Implicates Both  
922 Developmental and Functional Changes in the Neurobiology of Autism. *Cell* 1–17.  
923 <https://linkinghub.elsevier.com/retrieve/pii/S0092867419313984>.
- 924 Sestan N, State MW. 2018. Lost in Translation: Traversing the Complex Path from Genomics to  
925 Therapeutics in Autism Spectrum Disorder. *Neuron* **100**: 406–423.  
926 <https://doi.org/10.1016/j.neuron.2018.10.015>.
- 927 Shannon P, Markiel A, Ozier O, Baliga NS, Wang JT, Ramage D, Amin N, Schwikowski B,  
928 Ideker T. 2003. Cytoscape: a software environment for integrated models of biomolecular  
929 interaction networks. *Genome Res* **13**: 2498–504.  
930 <http://www.ncbi.nlm.nih.gov/pubmed/14597658>.
- 931 Shenhav R, Mahajan MA, Murn J, Tatarakis A, Barry BJ, Golden JA, Baltus AE, Wang EP,  
932 Samuels HH, Murphy EA, et al. 2012. Microcephaly Gene Links Trithorax and  
933 REST/NRSF to Control Neural Stem Cell Proliferation and Differentiation. *Cell* **151**: 1097–

- 934 1112. <http://dx.doi.org/10.1016/j.cell.2012.10.043>.
- 935 Shohat S, Ben-David E, Shifman S. 2017. Varying Intolerance of Gene Pathways to Mutational  
936 Classes Explain Genetic Convergence across Neuropsychiatric Disorders. *Cell Rep* **18**:  
937 2217–2227. <http://dx.doi.org/10.1016/j.celrep.2017.02.007>.
- 938 Skinnider MA, Squair JW, Foster LJ. 2019. Evaluating measures of association for single-cell  
939 transcriptomics. *Nat Methods* **16**: 381–386. <http://www.nature.com/articles/s41592-019-0372-4>.
- 941 Sundelin HEK, Larsson H, Lichtenstein P, Almqvist C, Hultman CM, Tomson T, Ludvigsson JF.  
942 2016. Autism and epilepsy: A population-based nationwide cohort study. *Neurology* **87**:  
943 192–197.
- 944 Sztainberg Y, Zoghbi HY. 2016. Lessons learned from studying syndromic autism spectrum  
945 disorders. *Nat Neurosci* **19**: 1408–1418.
- 946 Turner TN, Yi Q, Krumm N, Huddleston J, Hoekzema K, F Stessman HA, Doebley A-L, Bernier  
947 RA, Nickerson DA, Eichler EE. 2017. denovo-db: a compendium of human de novo  
948 variants. *Nucleic Acids Res* **45**: D804–D811.  
949 <http://www.ncbi.nlm.nih.gov/pubmed/27907889>.
- 950 Veeramah KR, O'Brien JE, Meisler MH, Cheng X, Dib-Hajj SD, Waxman SG, Talwar D,  
951 Girirajan S, Eichler EE, Restifo LL, et al. 2012. De Novo Pathogenic SCN8A Mutation  
952 Identified by Whole-Genome Sequencing of a Family Quartet Affected by Infantile  
953 Epileptic Encephalopathy and SUDEP. *Am J Hum Genet* **90**: 502–510.  
954 <https://linkinghub.elsevier.com/retrieve/pii/S0002929712000389>.
- 955 Vezzani A, Aronica E, Mazarati A, Pittman QJ. 2013. Epilepsy and brain inflammation. *Exp*  
956 *Neurol* **244**: 11–21. <https://linkinghub.elsevier.com/retrieve/pii/S0014488611003530>.
- 957 Vezzani A, French J, Bartfai T, Baram TZ. 2011. The role of inflammation in epilepsy. *Nat Rev*  
958 *Neurol* **7**: 31–40. <http://www.nature.com/articles/nrneurol.2010.178>.
- 959 Vorstman JAS, Hallmayer JF, Nurnberger Jr JI, Moreno-De-Luca D, Parr JR, Anney RJL. 2017.  
960 Autism genetics: opportunities and challenges for clinical translation. *Nat Rev Genet* **18**:  
961 362–376. <http://dx.doi.org/10.1038/nrg.2017.4>.
- 962 Willsey AJ, Morris MT, Wang S, Willsey HR, Sun N, Teerikorpi N, Baum TB, Cagney G,  
963 Bender KJ, Desai TA, et al. 2018. The Psychiatric Cell Map Initiative: A Convergent  
964 Systems Biological Approach to Illuminating Key Molecular Pathways in Neuropsychiatric  
965 Disorders. *Cell* **174**: 505–520. <https://doi.org/10.1016/j.cell.2018.06.016>.
- 966 Willsey AJ, Sanders SJ, Li M, Dong S, Tebbenkamp AT, Muhle RA, Reilly SK, Lin L,  
967 Fertuzinhos S, Miller JA, et al. 2013. Coexpression Networks Implicate Human Midfetal  
968 Deep Cortical Projection Neurons in the Pathogenesis of Autism. *Cell* **155**: 997–1007.  
969 <http://dx.doi.org/10.1016/j.cell.2013.10.020>.
- 970 Xiong J-Y, Liu X-Y, Li J-L, Vallon MW. 2007. Architecture of macromolecular network of soft  
971 functional materials: from structure to function. *J Phys Chem B* **111**: 5558–63.  
972 <http://www.ncbi.nlm.nih.gov/pubmed/17472367>.
- 973 Yuan H, Hansen KB, Zhang J, Mark Pierson T, Markello TC, Fajardo KVF, Holloman CM,  
974 Golas G, Adams DR, Boerkoel CF, et al. 2014. Functional analysis of a de novo GRIN2A  
975 missense mutation associated with early-onset epileptic encephalopathy. *Nat Commun* **5**:  
976 3251. <http://www.nature.com/articles/ncomms4251>.
- 977 Zhong S, Zhang S, Fan X, Wu Q, Yan L, Dong J, Zhang H, Li L, Sun L, Pan N, et al. 2018. A  
978 single-cell RNA-seq survey of the developmental landscape of the human prefrontal cortex.  
979 *Nature* **555**: 524–528. <http://www.nature.com/doi/10.1038/nature25980>.

980  
981

## 982 **Figure legends**

983 **Figure 1.** Co-expression enrichment analysis of high-confidence NDD genes in six major cell types of  
984 the human prefrontal cortex. (A) Co-expression fold enrichment of four NDD gene sets with dnLoF  
985 mutations and four NDD gene sets with dnMis mutations in six major cortical cell types as well as the  
986 sample size of the cell types. Gene set size is shown in parentheses. Circle size is proportional to co-  
987 expression fold enrichment score. (B,C) Co-expression fold enrichment of dnLoF-ASD (B) and dnMis-  
988 Epi genes (C) in six major cortical cell types by downsampling the same number of cells for each cell  
989 type. The violin plot shows the mean value (point). The statistical significance P value measures whether  
990 the mean co-expression fold enrichment score of the corresponding gene set is higher than that of the  
991 background genes by the one-sided Fisher's exact test. (D,E) Co-expression networks of dnLoF-ASD (D)  
992 and dnMis-Epi genes (E) in six major cortical cell types using the original sample size. Node size is  
993 proportional to co-expression degree.

994 **Figure 2.** Co-expression enrichment analysis of dnLoF-ASD and dnMis-Epi genes during NPC and  
995 neuron development. (A-C) Co-expression fold enrichment of dnLoF-ASD and dnMis-Epi genes at  
996 specific stages of NPCs (A), excitatory neurons (B), and interneurons (C) by downsampling the same  
997 number of cells for each cell stage. (D) Co-expression fold enrichment of dnLoF-ASD and dnMis-Epi  
998 genes in vRG cells, IPCs, and the transition at GW10 by downsampling the same number of cells for each  
999 condition. (E,F) Co-expression fold enrichment of dnLoF-ASD and dnMis-Epi genes in vRG cells, oRG  
1000 cells, IPCs, and their transitions at GW16 by downsampling 20 cells (E) and 37 cells (F) for each  
1001 condition. In (A-F), asterisks above boxplot indicate  $-\log_{10}(P)$  value that measures statistical significance  
1002 whether the mean co-expression fold enrichment score of the corresponding gene set is higher than that of  
1003 the background genes by the one-sided Fisher's exact test (\*  $1 \leq -\log_{10}(P) < 2$ , \*\*  $2 \leq -\log_{10}(P) < 5$ , \*\*\*  $5 \leq$   
1004  $-\log_{10}(P) < 10$ , \*\*\*\*  $10 \leq -\log_{10}(P)$ ). (G) The expression of dnLoF-ASD and dnMis-Epi genes is  
1005 significantly increased during the transition from vRG cells to IPCs at GW10. The dashed horizontal line

1006 indicates the median  $\log_2(\text{fold change})$  value of the background genes. The statistical significance P  
1007 values measure whether dnLoF-ASD and dnMis-Epi genes have higher  $\log_2(\text{fold change})$  values than the  
1008 background genes during the transition by the one-sided Wilcoxon rank sum test. (H,I) Co-expression  
1009 networks of dnLoF-ASD (H) and dnMis-Epi genes (I) in vRG cells, IPCs, and the transition at GW10  
1010 using original sample size. Node size is proportional to co-expression degree.

1011 **Figure 3.** Co-expression enrichment analysis of dnLoF-ASD and dnMis-Epi genes during differentiation  
1012 from NPCs to excitatory neurons (Ex). (A,B) Co-expression fold enrichment of dnLoF-ASD and dnMis-  
1013 Epi genes in NPCs, excitatory neurons, and the differentiation at GW10 (A) and GW16 (B) by  
1014 downsampling the same number of cells for each condition. Asterisks above boxplot indicate  $-\log_{10}(P)$   
1015 value that measures statistical significance whether the mean co-expression fold enrichment score of the  
1016 corresponding gene set is higher than that of the background genes by the one-sided Fisher's exact test (\*  
1017  $1 \leq -\log_{10}(P) < 2$ , \*\*  $2 \leq -\log_{10}(P) < 5$ , \*\*\*  $5 \leq -\log_{10}(P) < 10$ , \*\*\*\*  $10 \leq -\log_{10}(P)$ ). (C) The expression of  
1018 dnMis-Epi but not dnLoF-ASD genes is significantly increased during the differentiation from NPCs to  
1019 excitatory neurons at GW10. (D) The expression of dnLoF-ASD and dnMis-Epi genes is significantly  
1020 increased during the differentiation from NPCs to excitatory neurons at GW16. In (C,D), the dashed  
1021 horizontal line indicates the median  $\log_2(\text{fold change})$  value of the background genes. The statistical  
1022 significance P values measure whether dnLoF-ASD and dnMis-Epi genes have higher  $\log_2(\text{fold change})$   
1023 values than the background genes during the differentiation by the one-sided Wilcoxon rank sum test.

1024 **Figure 4.** GO correlation and expression change analyses of dnLoF-ASD and dnMis-Epi genes during  
1025 the vRG-to-IPC transition at GW10. (A,B) Scatter plot shows the significance values from GO positive  
1026 correlation analysis of dnLoF-ASD (A) and dnMis-Epi genes (B) on the horizontal axis versus the  
1027 significance values from GO expression increase analysis on the vertical axis during the transition. Dots  
1028 represent individual GO biological process terms. Each dot has  $-\log_{10}(\text{FDR})$  value on the horizontal axis  
1029 that measures how significantly genes annotated under a GO term are positively correlated with dnLoF-  
1030 ASD (A) and dnMis-Epi genes (B) during the transition by the one-sided Wilcoxon rank sum test, and -  
1031  $\log_{10}(\text{FDR})$  value on the vertical axis that measures how significantly genes annotated under the GO term



1032 have higher  $\log_2(\text{fold change})$  values than the background genes during the transition by the one-sided  
1033 Wilcoxon rank sum test. The dashed vertical and horizontal lines indicate  $-\log_{10}(\text{FDR})$  at 4 and 2 as  
1034 significance thresholds. Significant GO terms from both analyses are shown in red, significant GO terms  
1035 only from GO positive correlation analysis are shown in green, and significant GO terms only from GO  
1036 expression increase analysis are shown in blue. Selected representative GO terms are labeled. (C,D)  
1037 Similar to (A,B) with GO negative correlation and expression decrease analyses of dnLoF-ASD (C) and  
1038 dnMis-Epi genes (D) during the transition.

1039 **Figure 5.** GO enrichment and correlation analyses of dnLoF-ASD and dnMis-Epi genes during the vRG-  
1040 to-IPC transition at GW10. (A,B) Scatter plot shows the significance values from GO enrichment analysis  
1041 on the horizontal axis versus the significance values from GO positive correlation analysis on the vertical  
1042 axis of dnLoF-ASD (A) and dnMis-Epi genes (B) during the transition. Dots represent individual GO  
1043 biological process terms. Each dot has  $-\log_{10}(\text{FDR})$  value on the horizontal axis that measures statistical  
1044 significance of the overlap between genes annotated under a GO term and dnLoF-ASD (A) and dnMis-  
1045 Epi genes (B) by the one-sided Fisher's exact test, and  $-\log_{10}(\text{FDR})$  value on the vertical axis that  
1046 measures how significantly genes annotated under the GO term are positively correlated with dnLoF-  
1047 ASD genes during the transition by the one-sided Wilcoxon rank sum test. The dashed vertical and  
1048 horizontal lines indicate  $-\log_{10}(\text{FDR})$  at 2 and 4 as significance thresholds. Significant GO terms from  
1049 both analyses are shown in red, significant GO terms only from GO enrichment analysis are shown in  
1050 green, and significant GO terms only from GO positive correlation analysis are shown in blue. Selected  
1051 representative GO terms are labeled. (C,D) Similar to (A,B) with GO enrichment and negative correlation  
1052 analyses of dnLoF-ASD (C) and dnMis-Epi genes (D) during the transition.

1053 **Figure 6.** *CHD8* target gene analyses. (A) Expression change of *CHD8*-activated and -repressed target  
1054 genes during the transition from vRG cells to IPCs at GW10. The dashed horizontal line indicates the  
1055 median  $\log_2(\text{fold change})$  value of the background genes. The statistical significance P values measure  
1056 whether *CHD8*-activated (-repressed) target genes have higher (lower)  $\log_2(\text{fold change})$  values than the  
1057 background genes during the transition by the one-sided Wilcoxon rank sum test. (B) Spearman's

1058 correlation between *CHD8*-activated/-repressed target genes and *CHD8* during the transition. The dashed  
1059 horizontal line indicates the median Spearman's correlation with *CHD8* for the background genes. The  
1060 statistical significance P values measure whether *CHD8*-activated (-repressed) target genes have higher  
1061 (lower) correlation with *CHD8* than the background genes during the transition by the one-sided  
1062 Wilcoxon rank sum test. (C,D) Top GO terms enriched with *CHD8*-activated (C) and -repressed target  
1063 genes (D).

1064 **Figure 7.** Co-expression network organization of ASD genes with dnLoF mutations in NPCs, and  
1065 epilepsy genes with dnMis mutations in interneurons. (A) Spearman's correlation with dnLoF-ASD genes  
1066 in NPCs for ASD genes with  $\geq 3$ , 2, 1 and 0 dnLoF mutations. (B) Spearman's correlation with dnMis-Epi  
1067 genes in interneurons for epilepsy genes with  $\geq 2$ , 1 and 0 dnMis mutations. (C) Co-expression network of  
1068 ASD genes with at least one dnLoF mutations in NPCs. Red, green and blue nodes indicate ASD genes  
1069 with  $\geq 3$ , 2 and 1 dnLoF mutations, respectively. Red, green and blue edges indicate co-expression within  
1070 ASD genes with  $\geq 3$ , 2 and 1 dnLoF mutations, respectively, and orange edges indicate co-expression  
1071 between ASD genes with  $\geq 3$  dnLoF mutations and ASD genes with 2 dnLoF mutations. (D) Co-  
1072 expression network of epilepsy genes with at least one dnMis mutations in interneurons. Red and blue  
1073 nodes indicate epilepsy genes with  $\geq 2$  and 1 dnMis mutations, respectively. Red and blue edges indicate  
1074 co-expression within epilepsy genes with  $\geq 2$  and 1 dnMis mutations, respectively. In (C,D), node size is  
1075 proportional to co-expression degree. (E) Co-expression degree in the NPC network of ASD genes with  
1076  $\geq 3$ , 2 and 1 dnLoF mutations. (F) Co-expression degree in the interneuron network of epilepsy genes with  
1077  $\geq 2$  and 1 dnMis mutations. In (A,B,E,F), the statistical significance P values are calculated using the one-  
1078 sided Wilcoxon rank sum test.

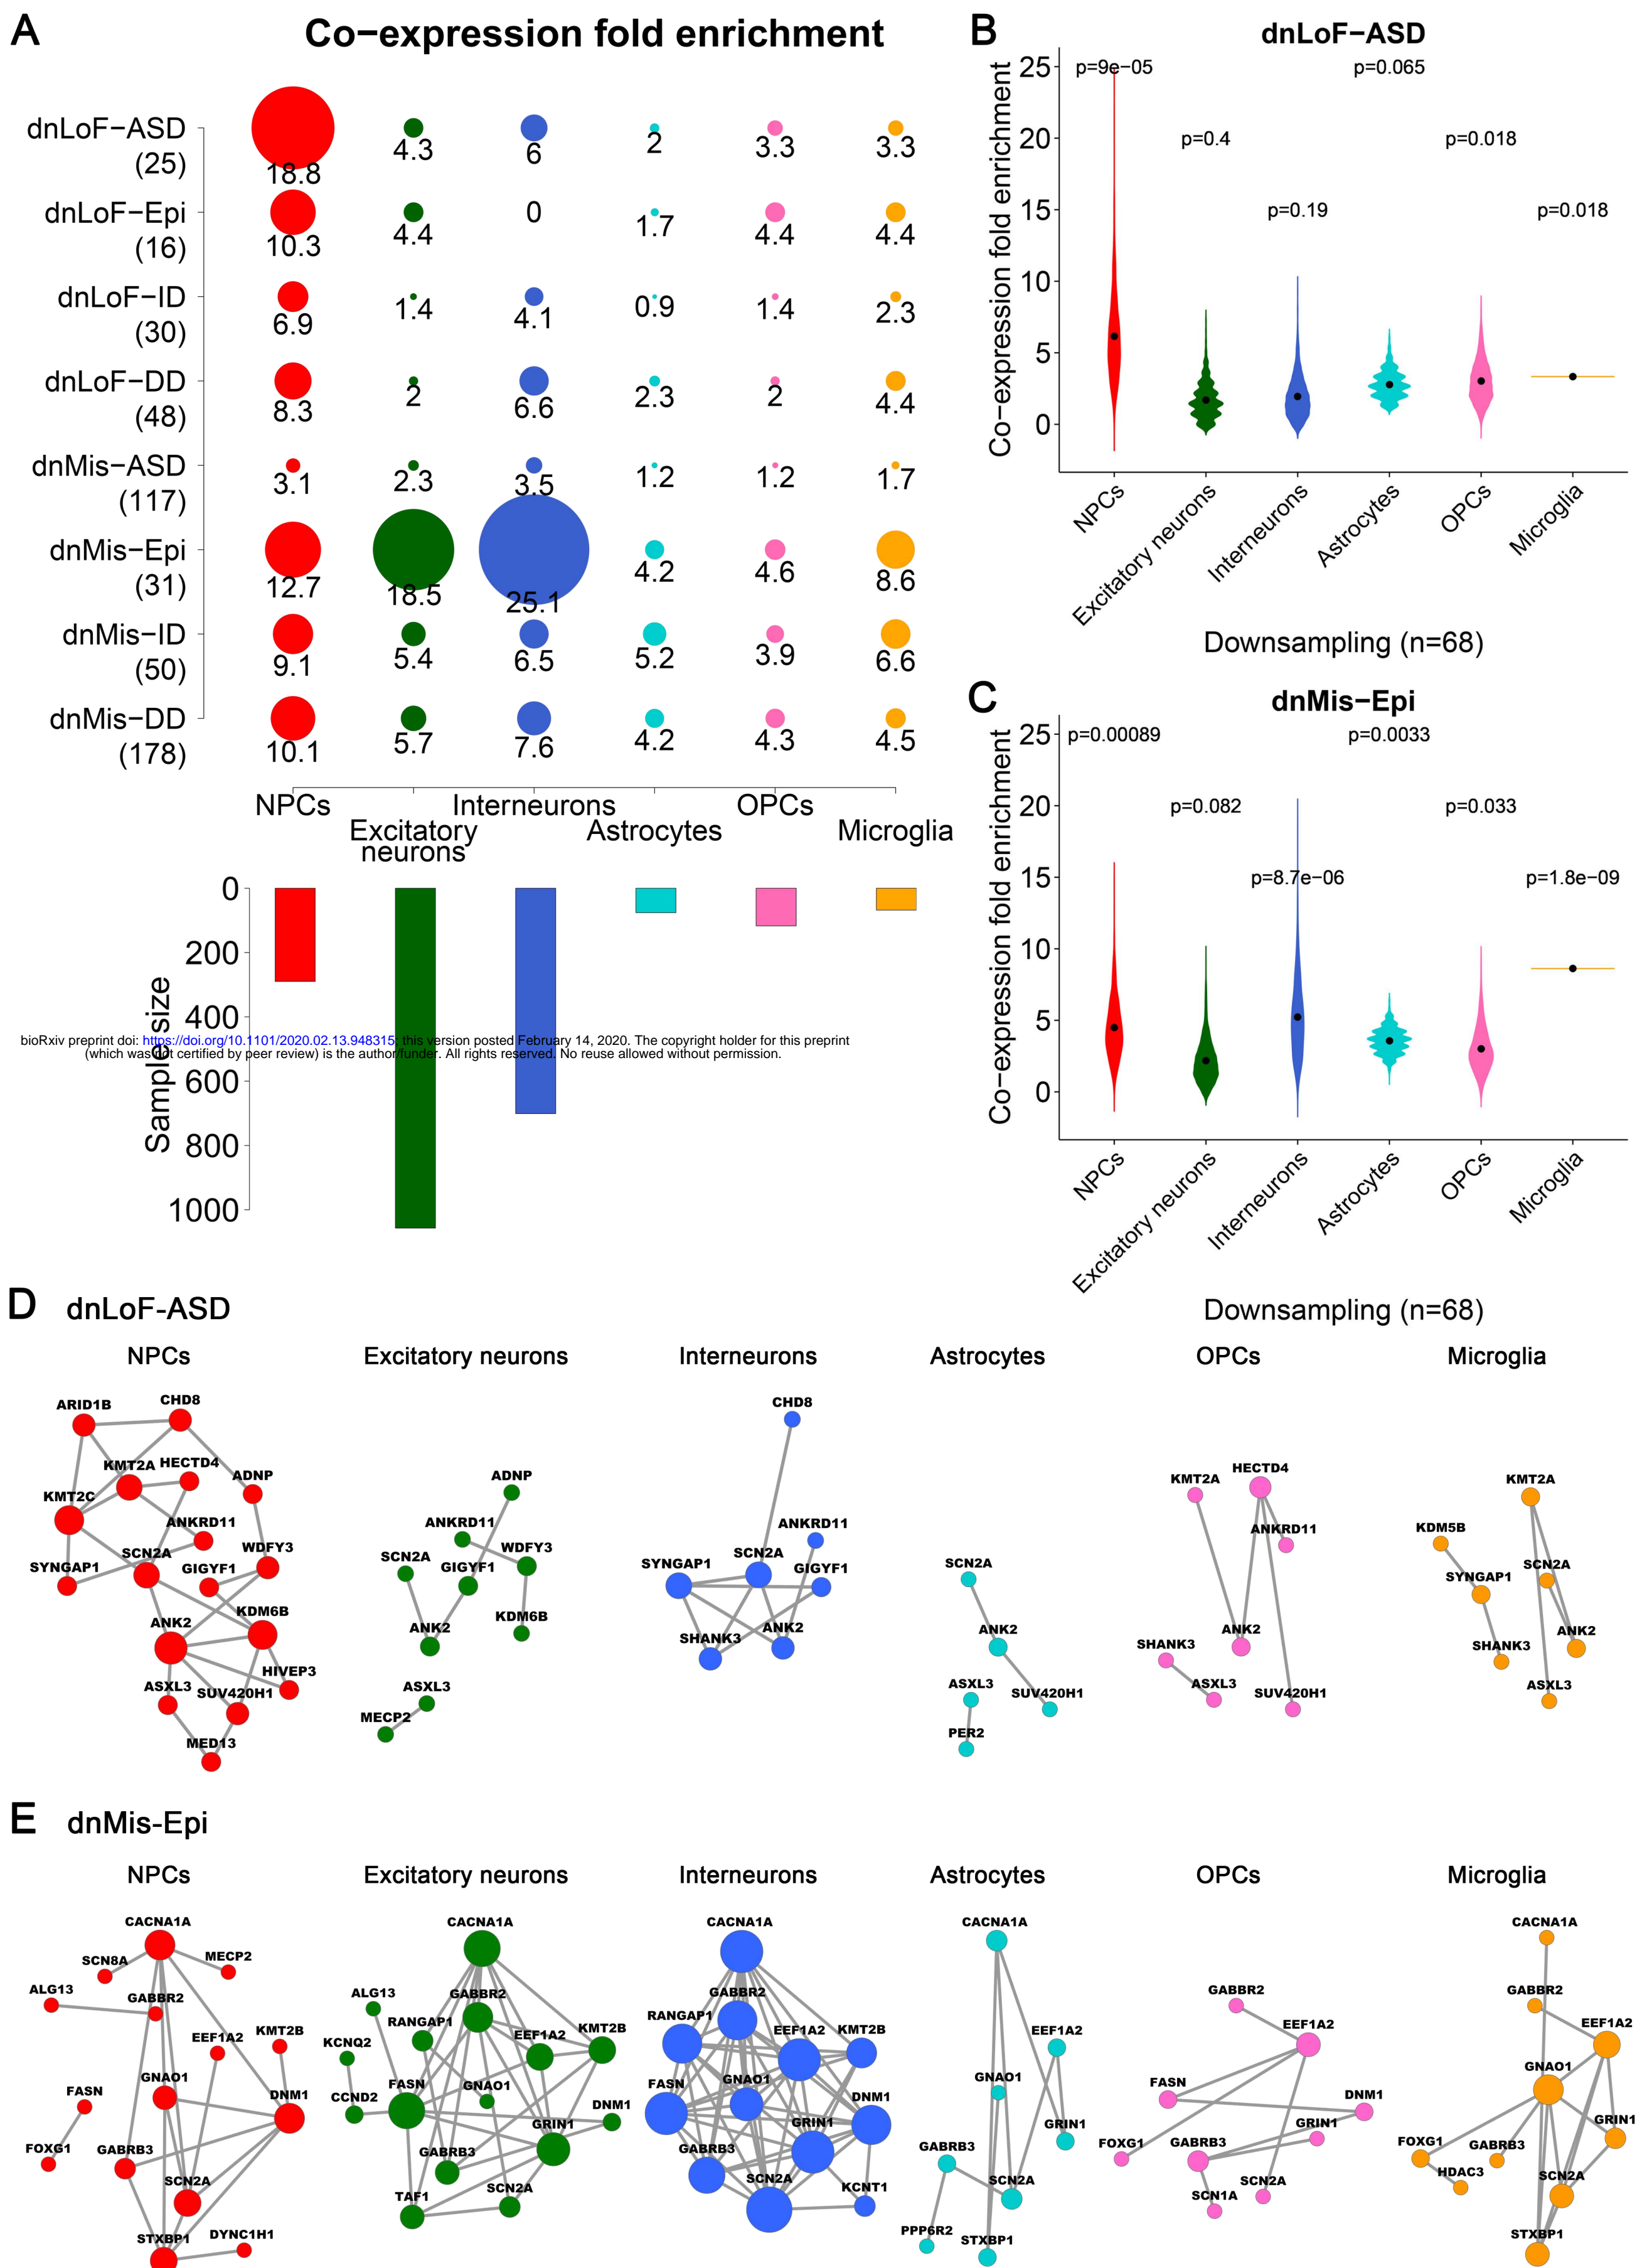

Fig. 1



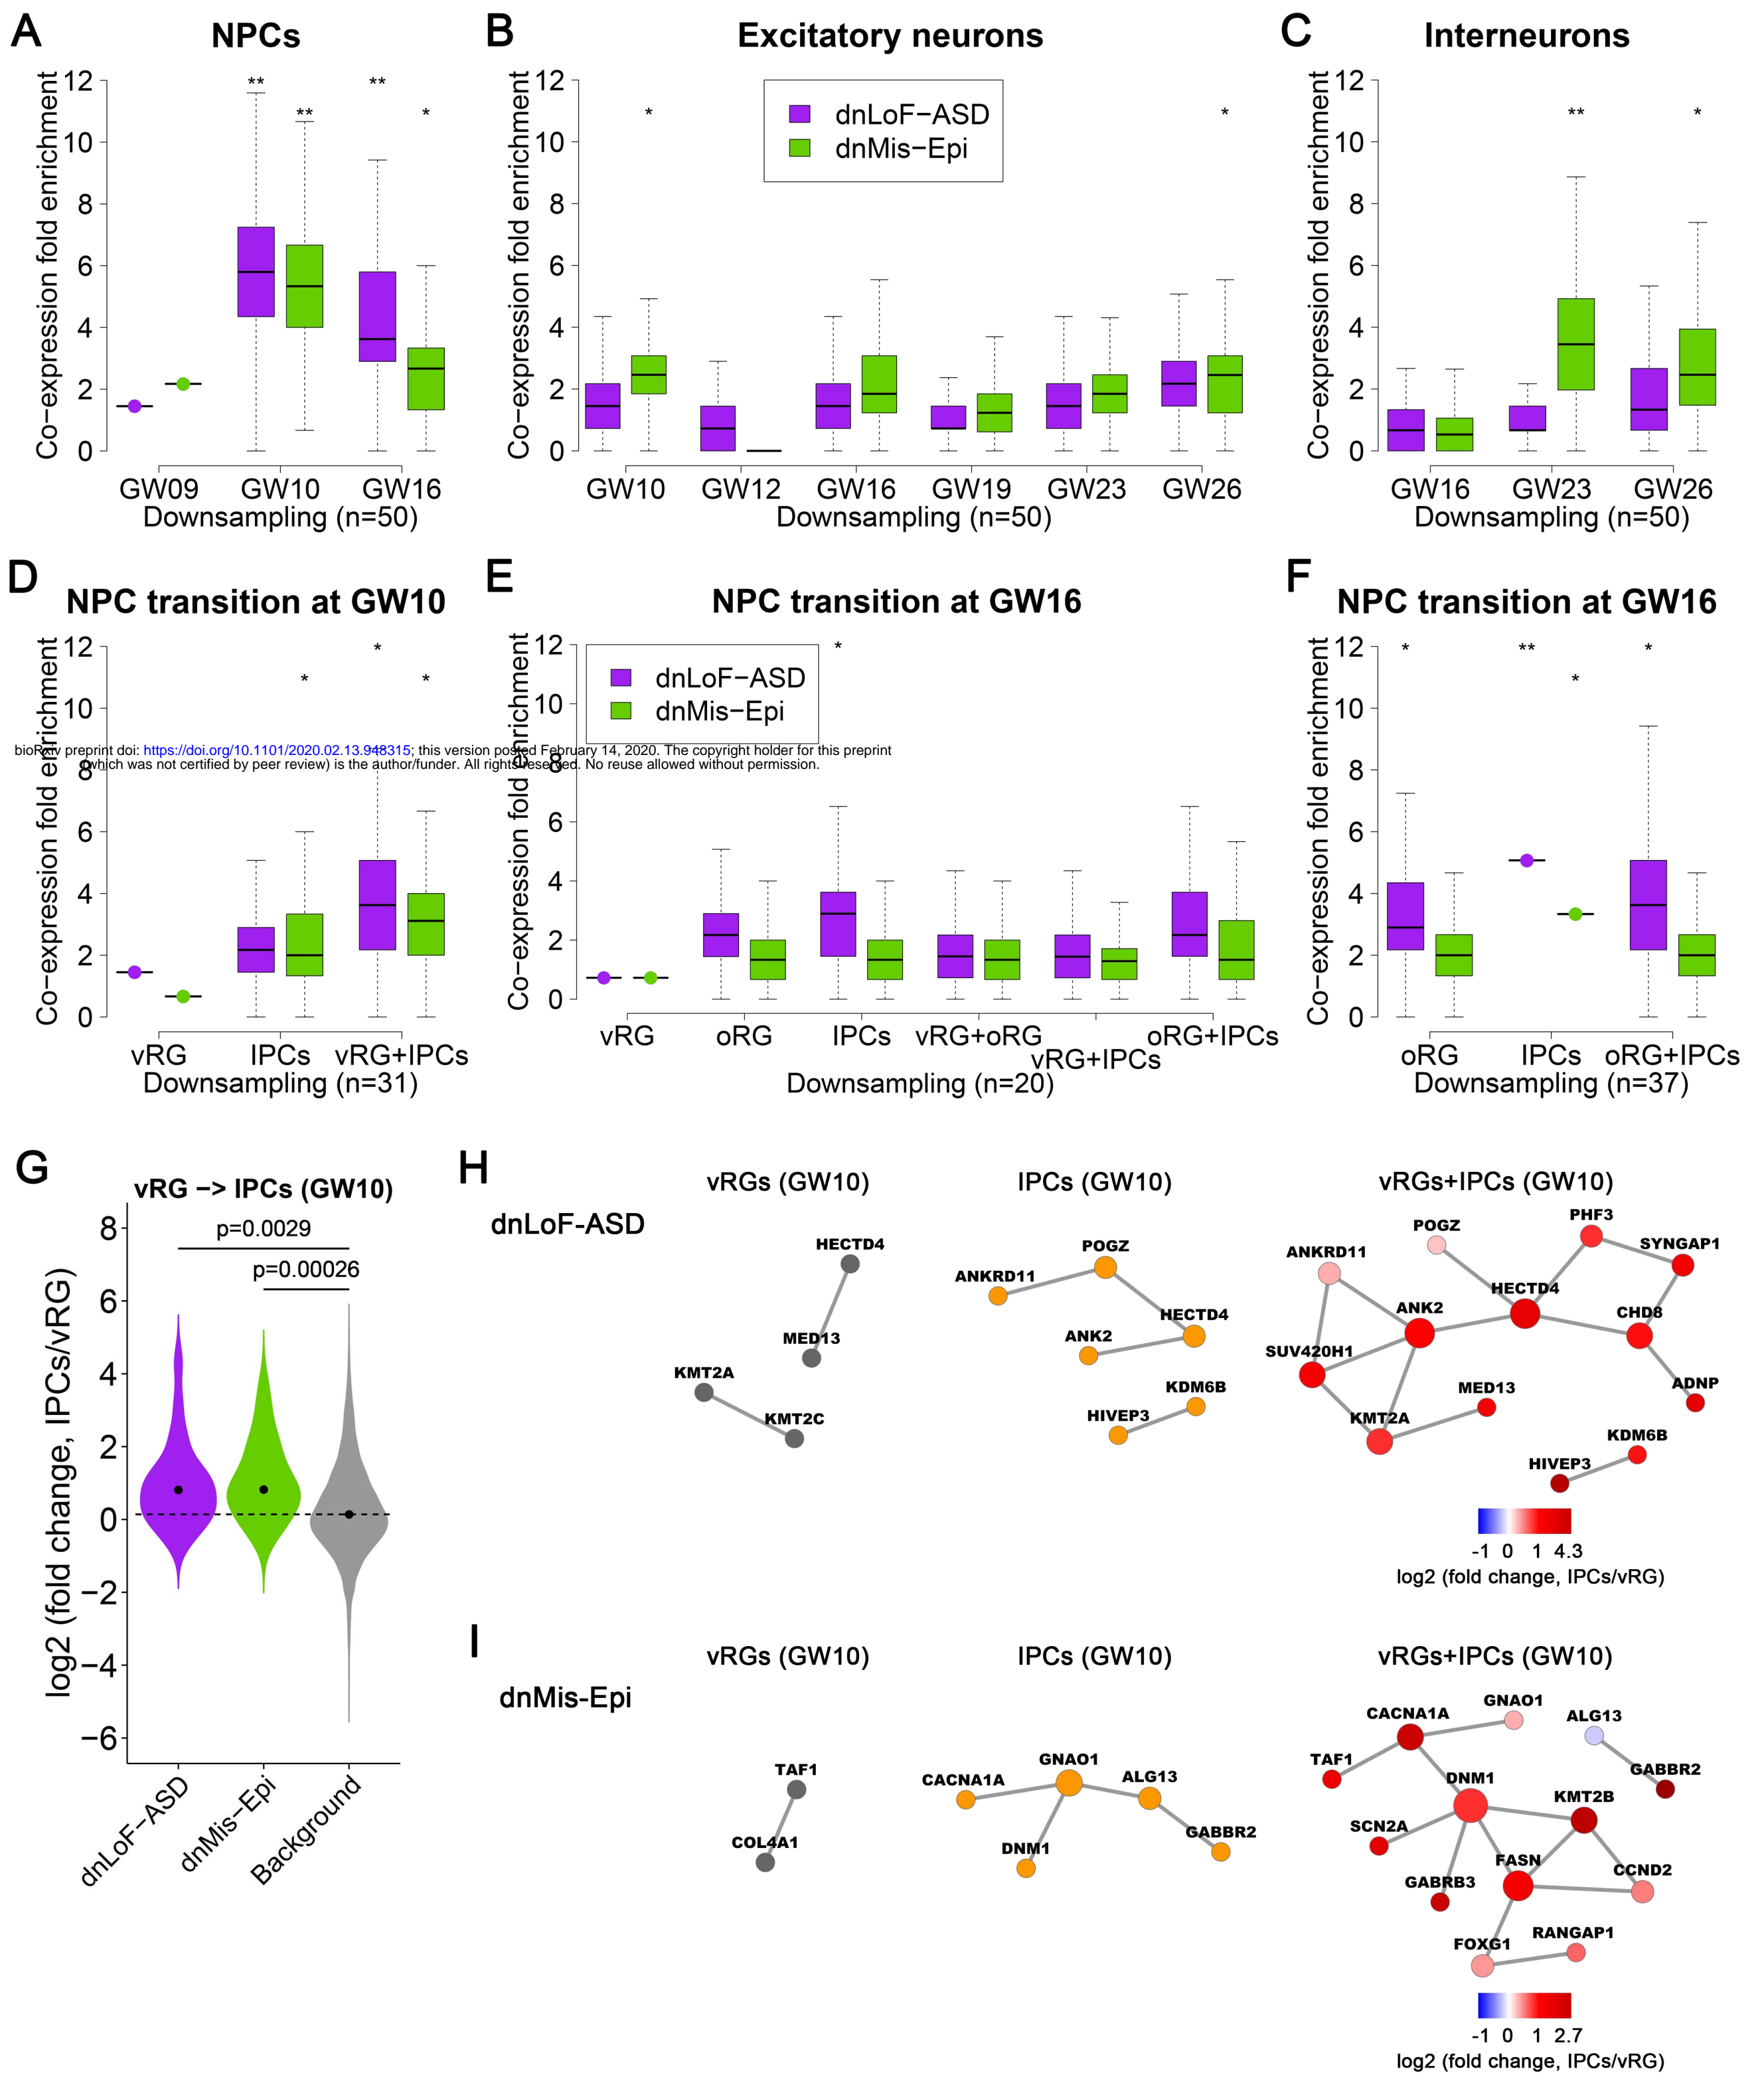

Fig. 2

### A NPCs → Ex at GW10

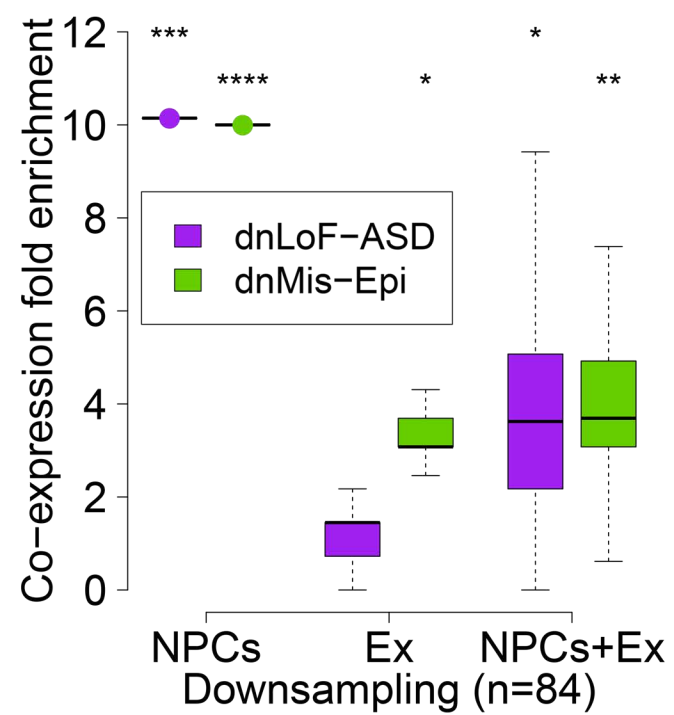

### B NPCs → Ex at GW16

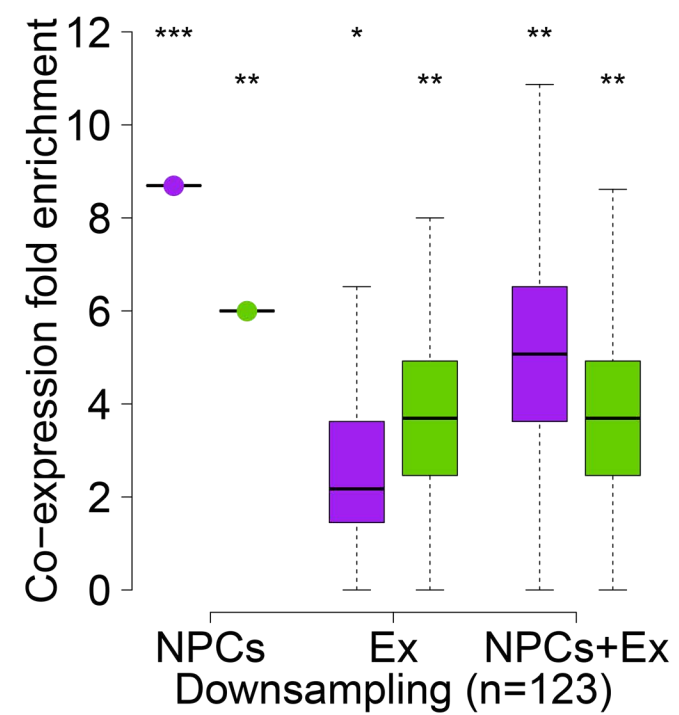

### C NPCs → Ex (GW10)

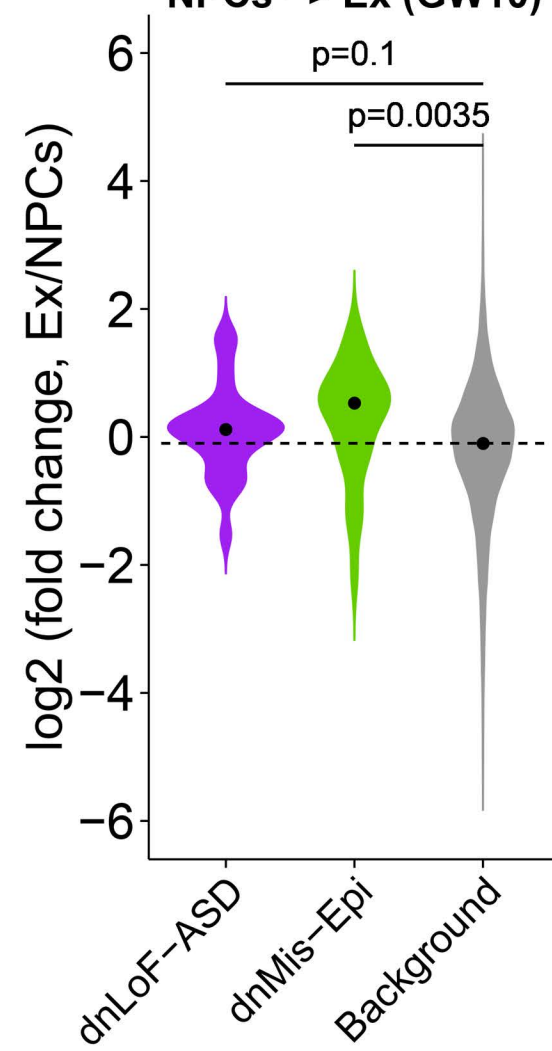

### D NPCs → Ex (GW16)

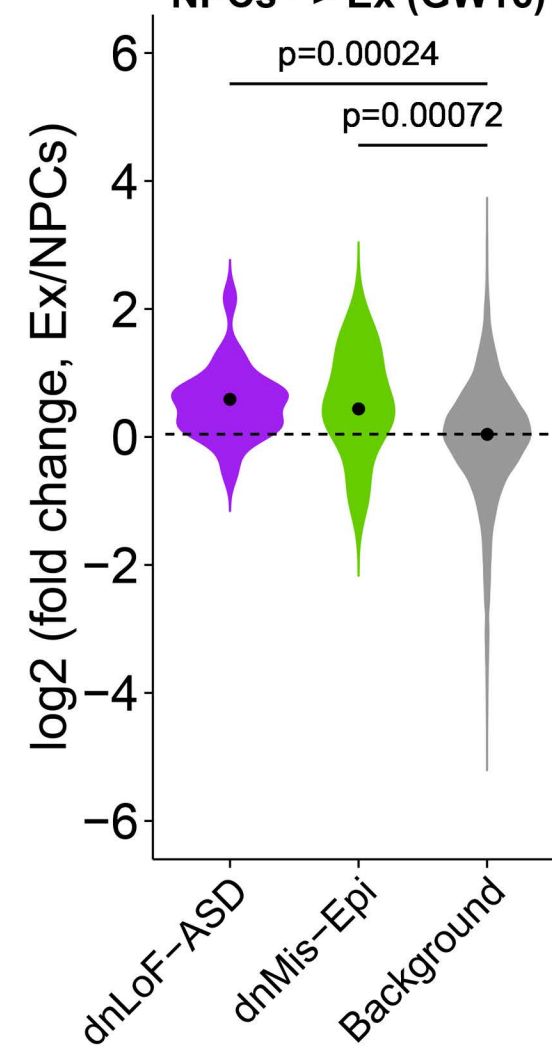

Fig. 3

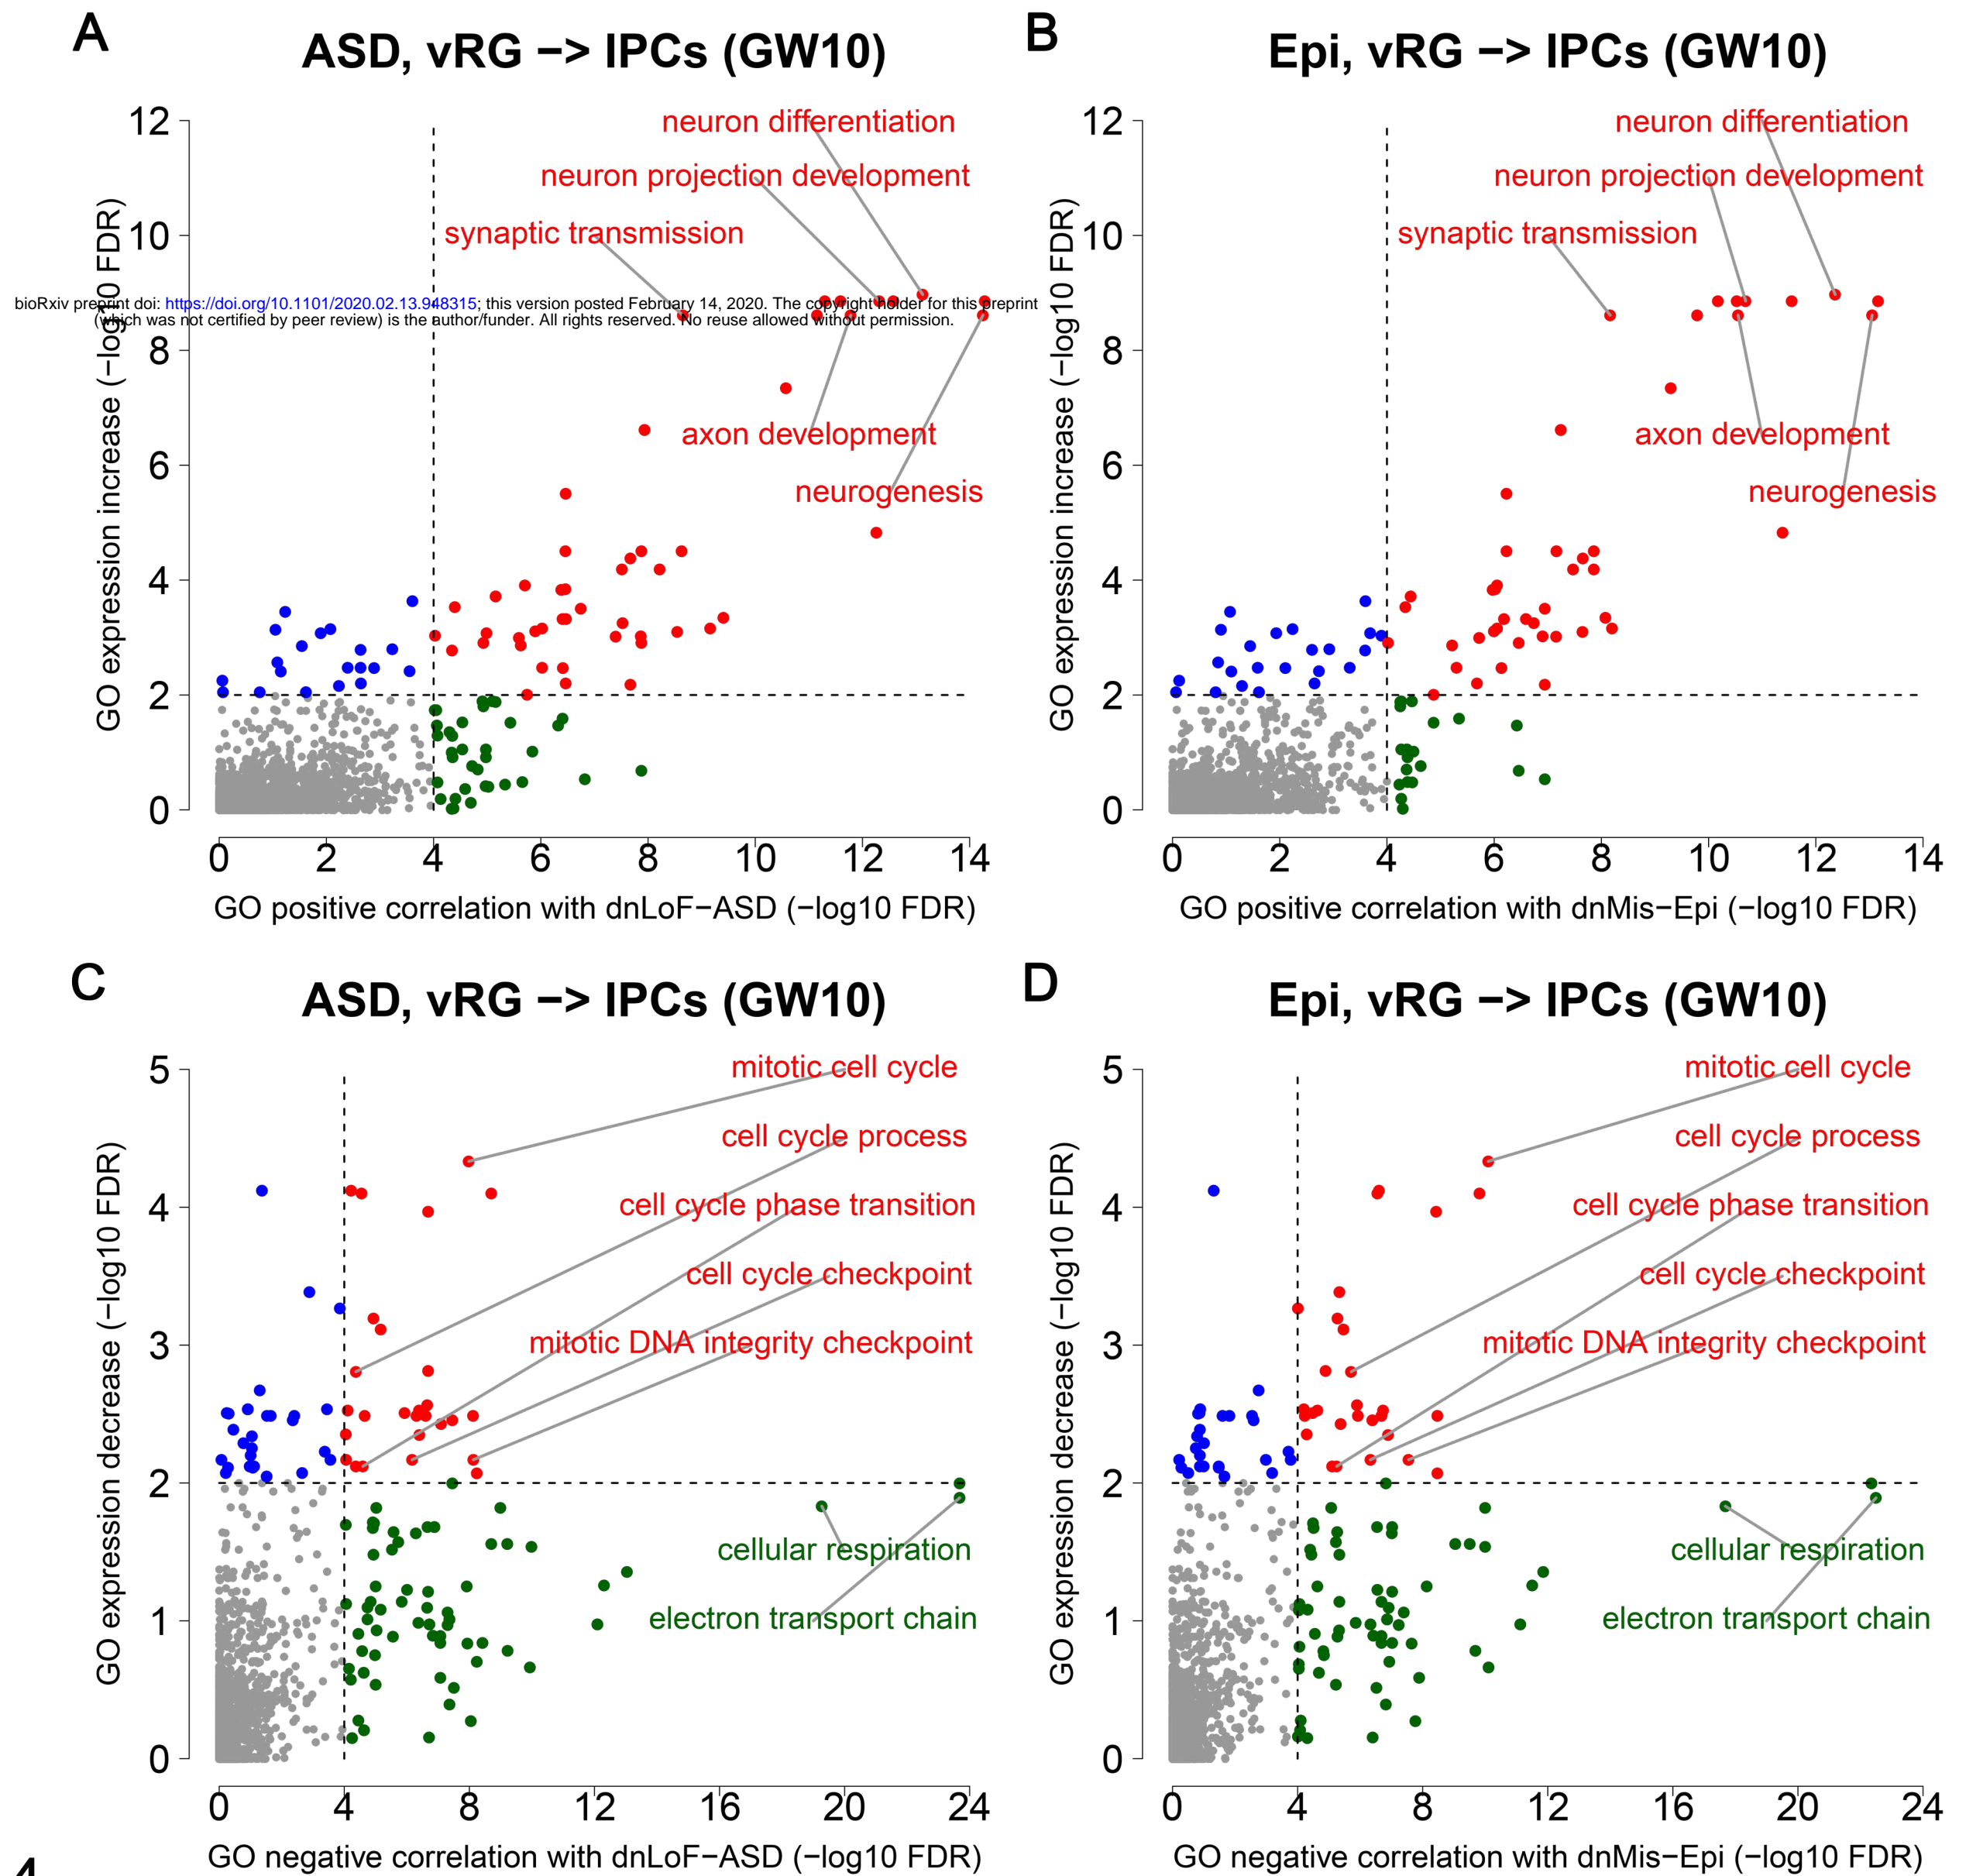

**Fig. 4**



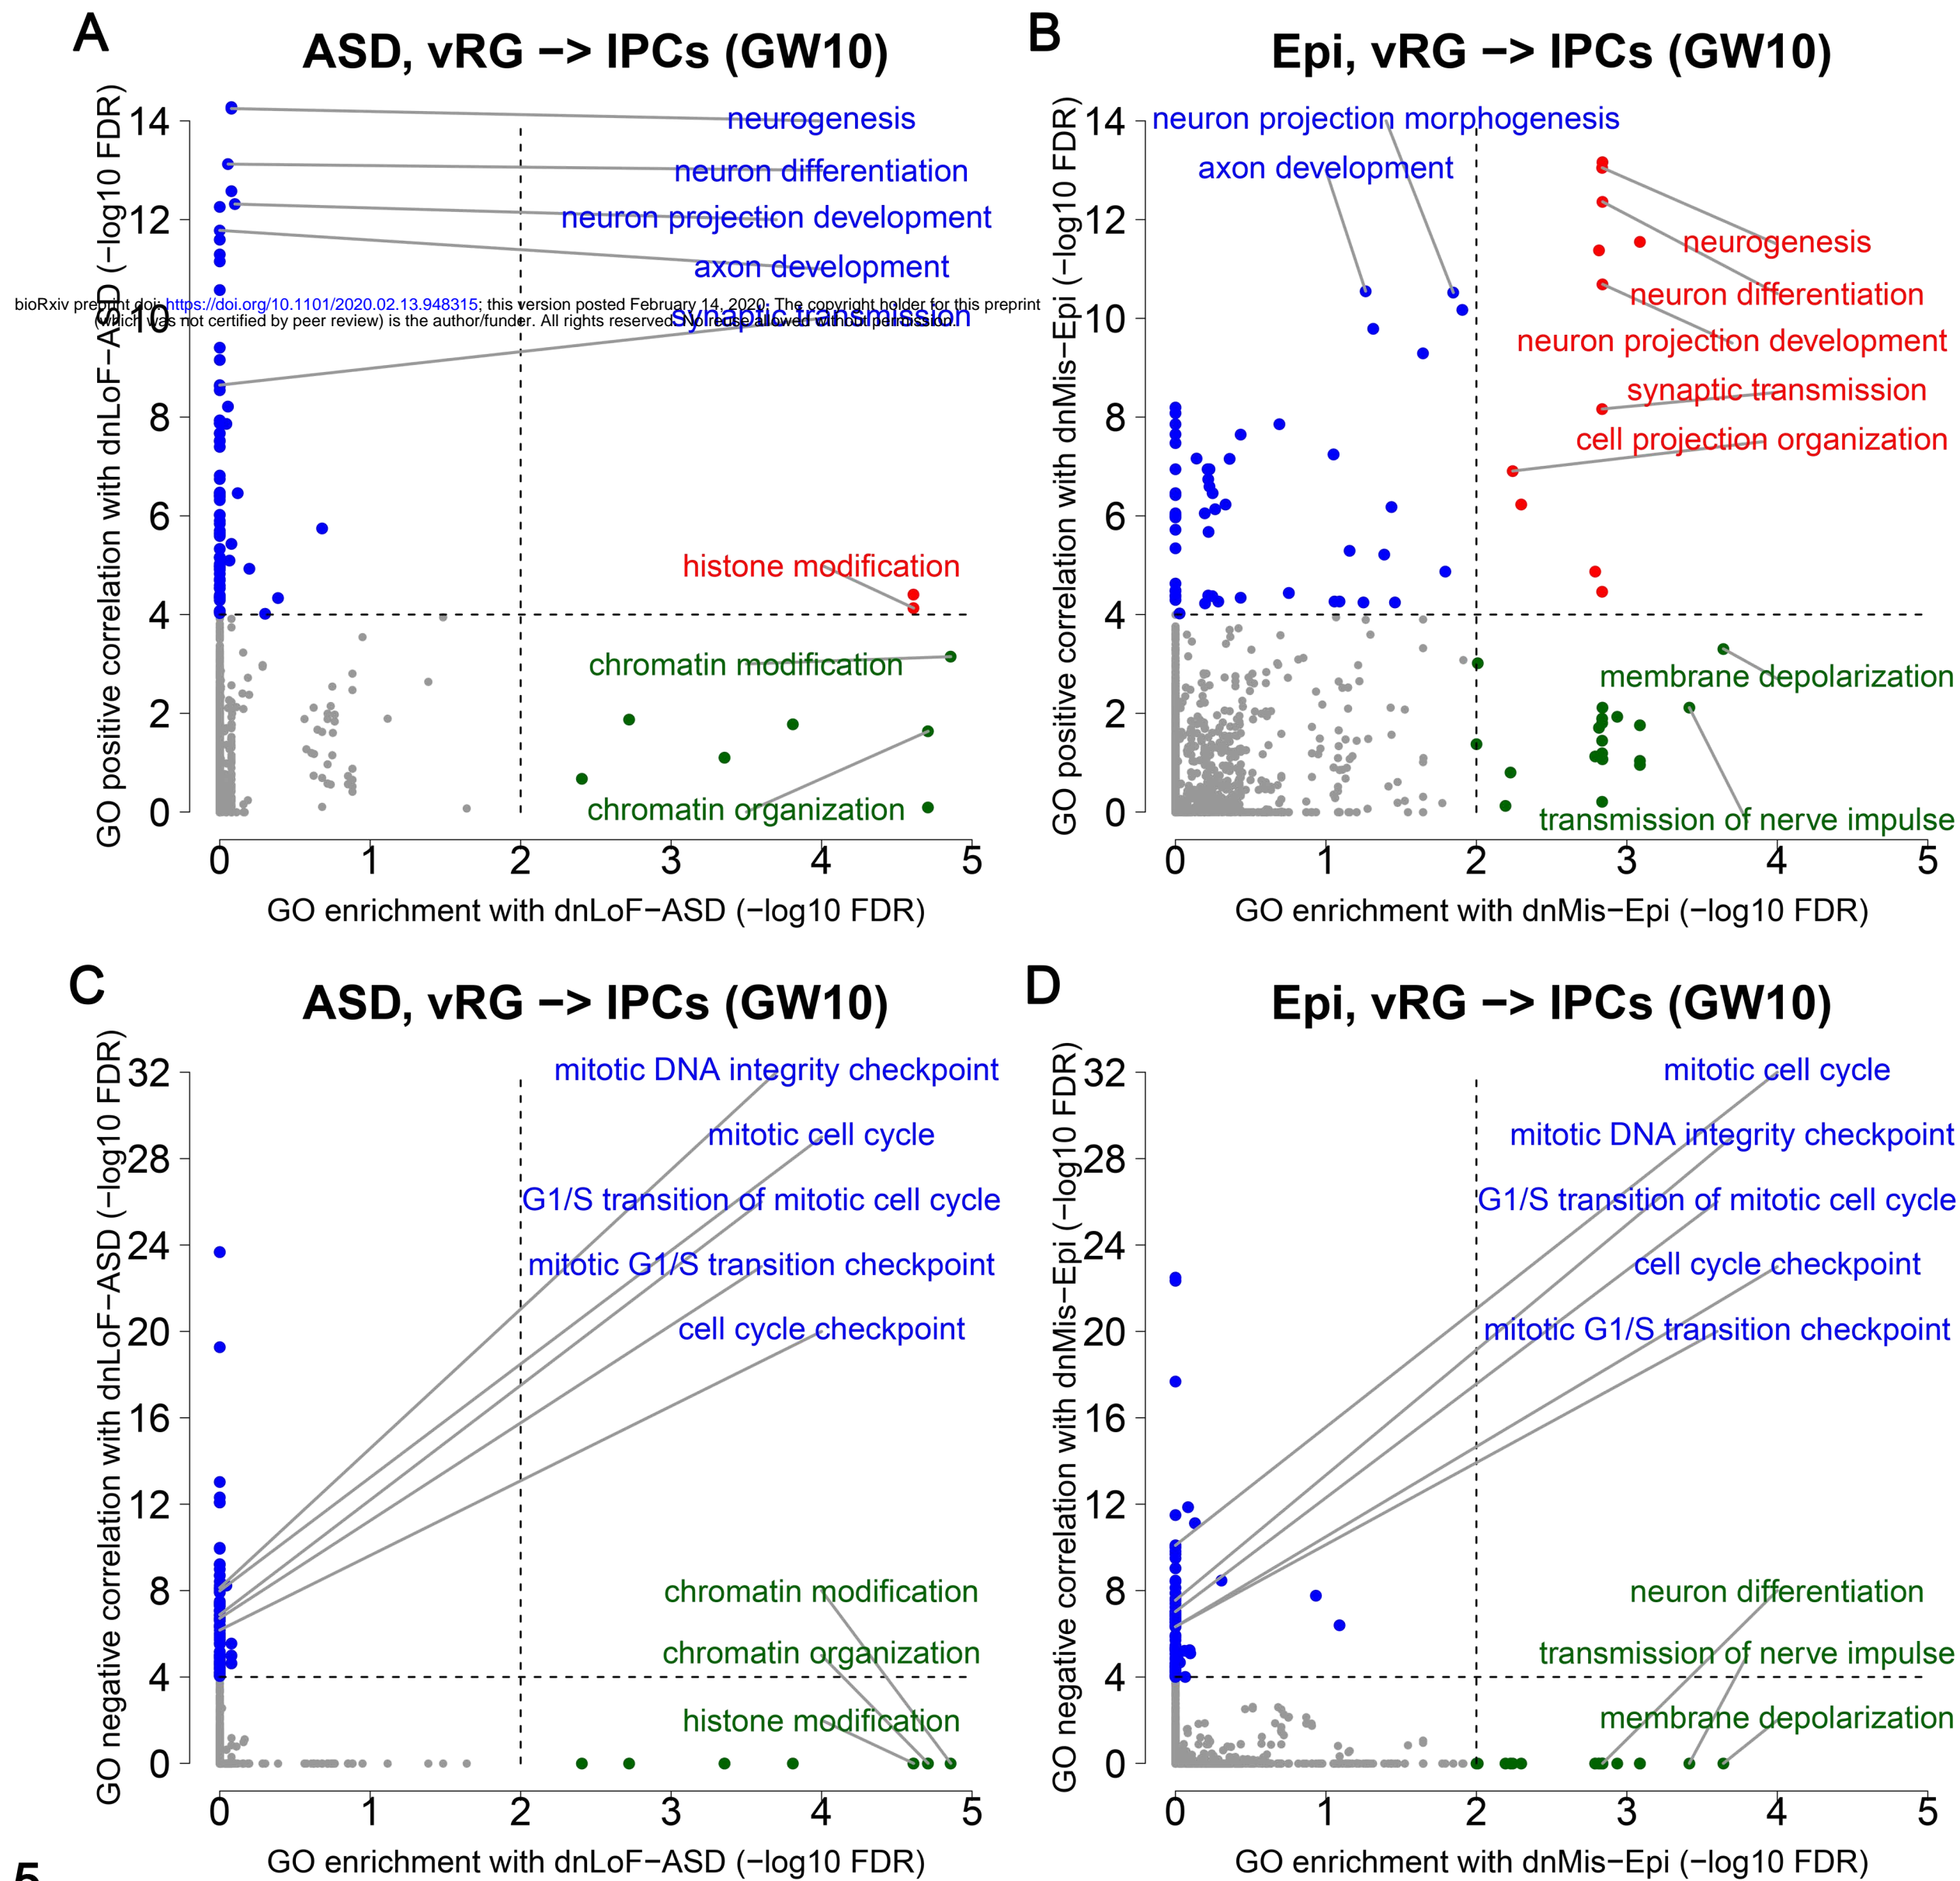

**Fig. 5**

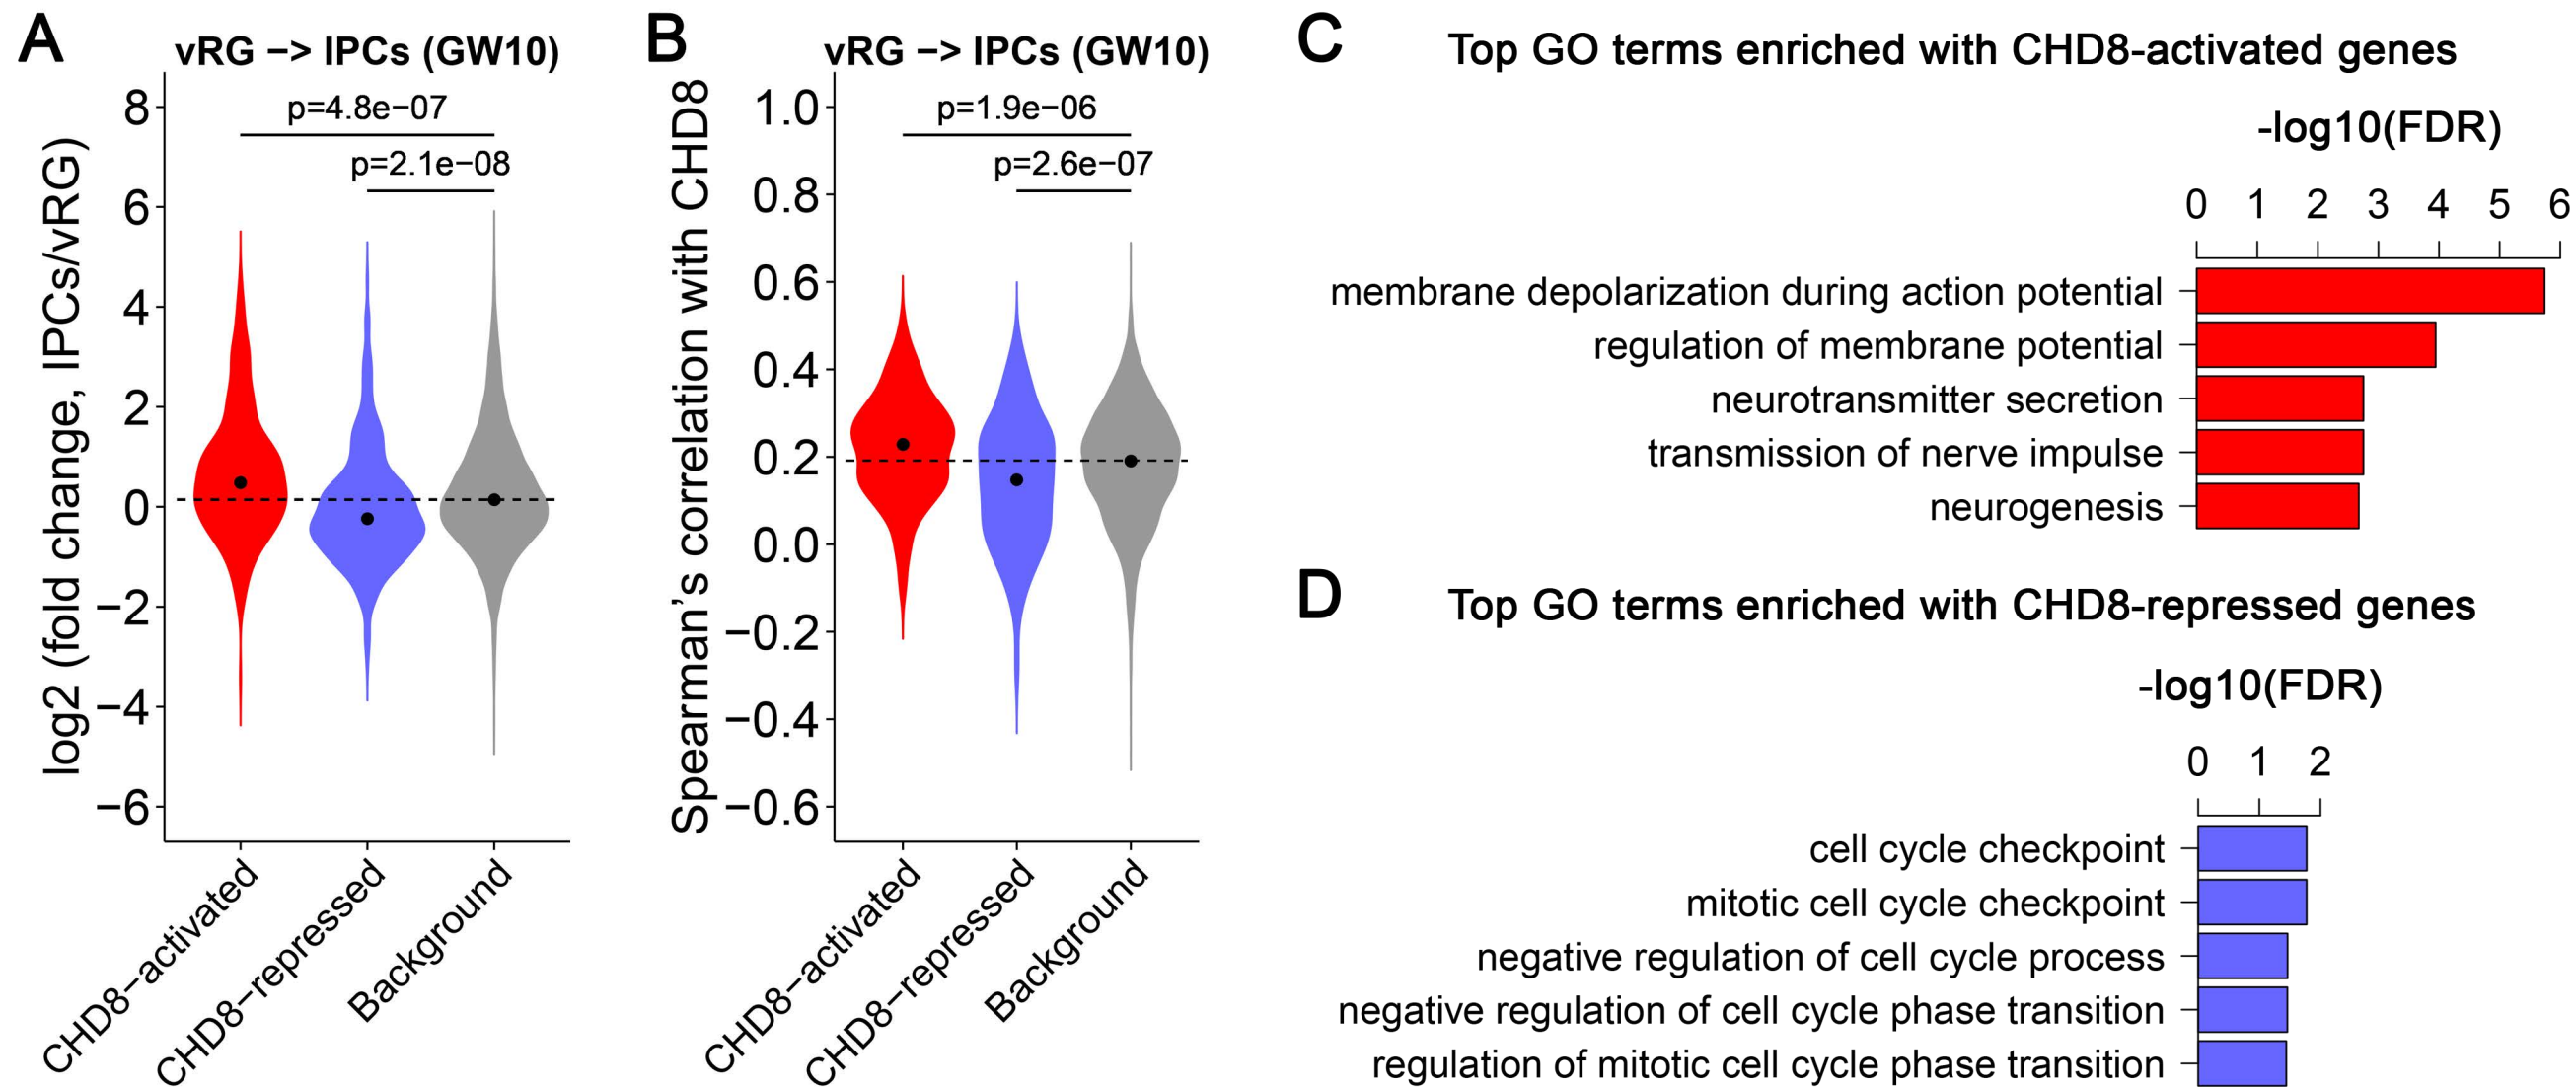

**Fig. 6**



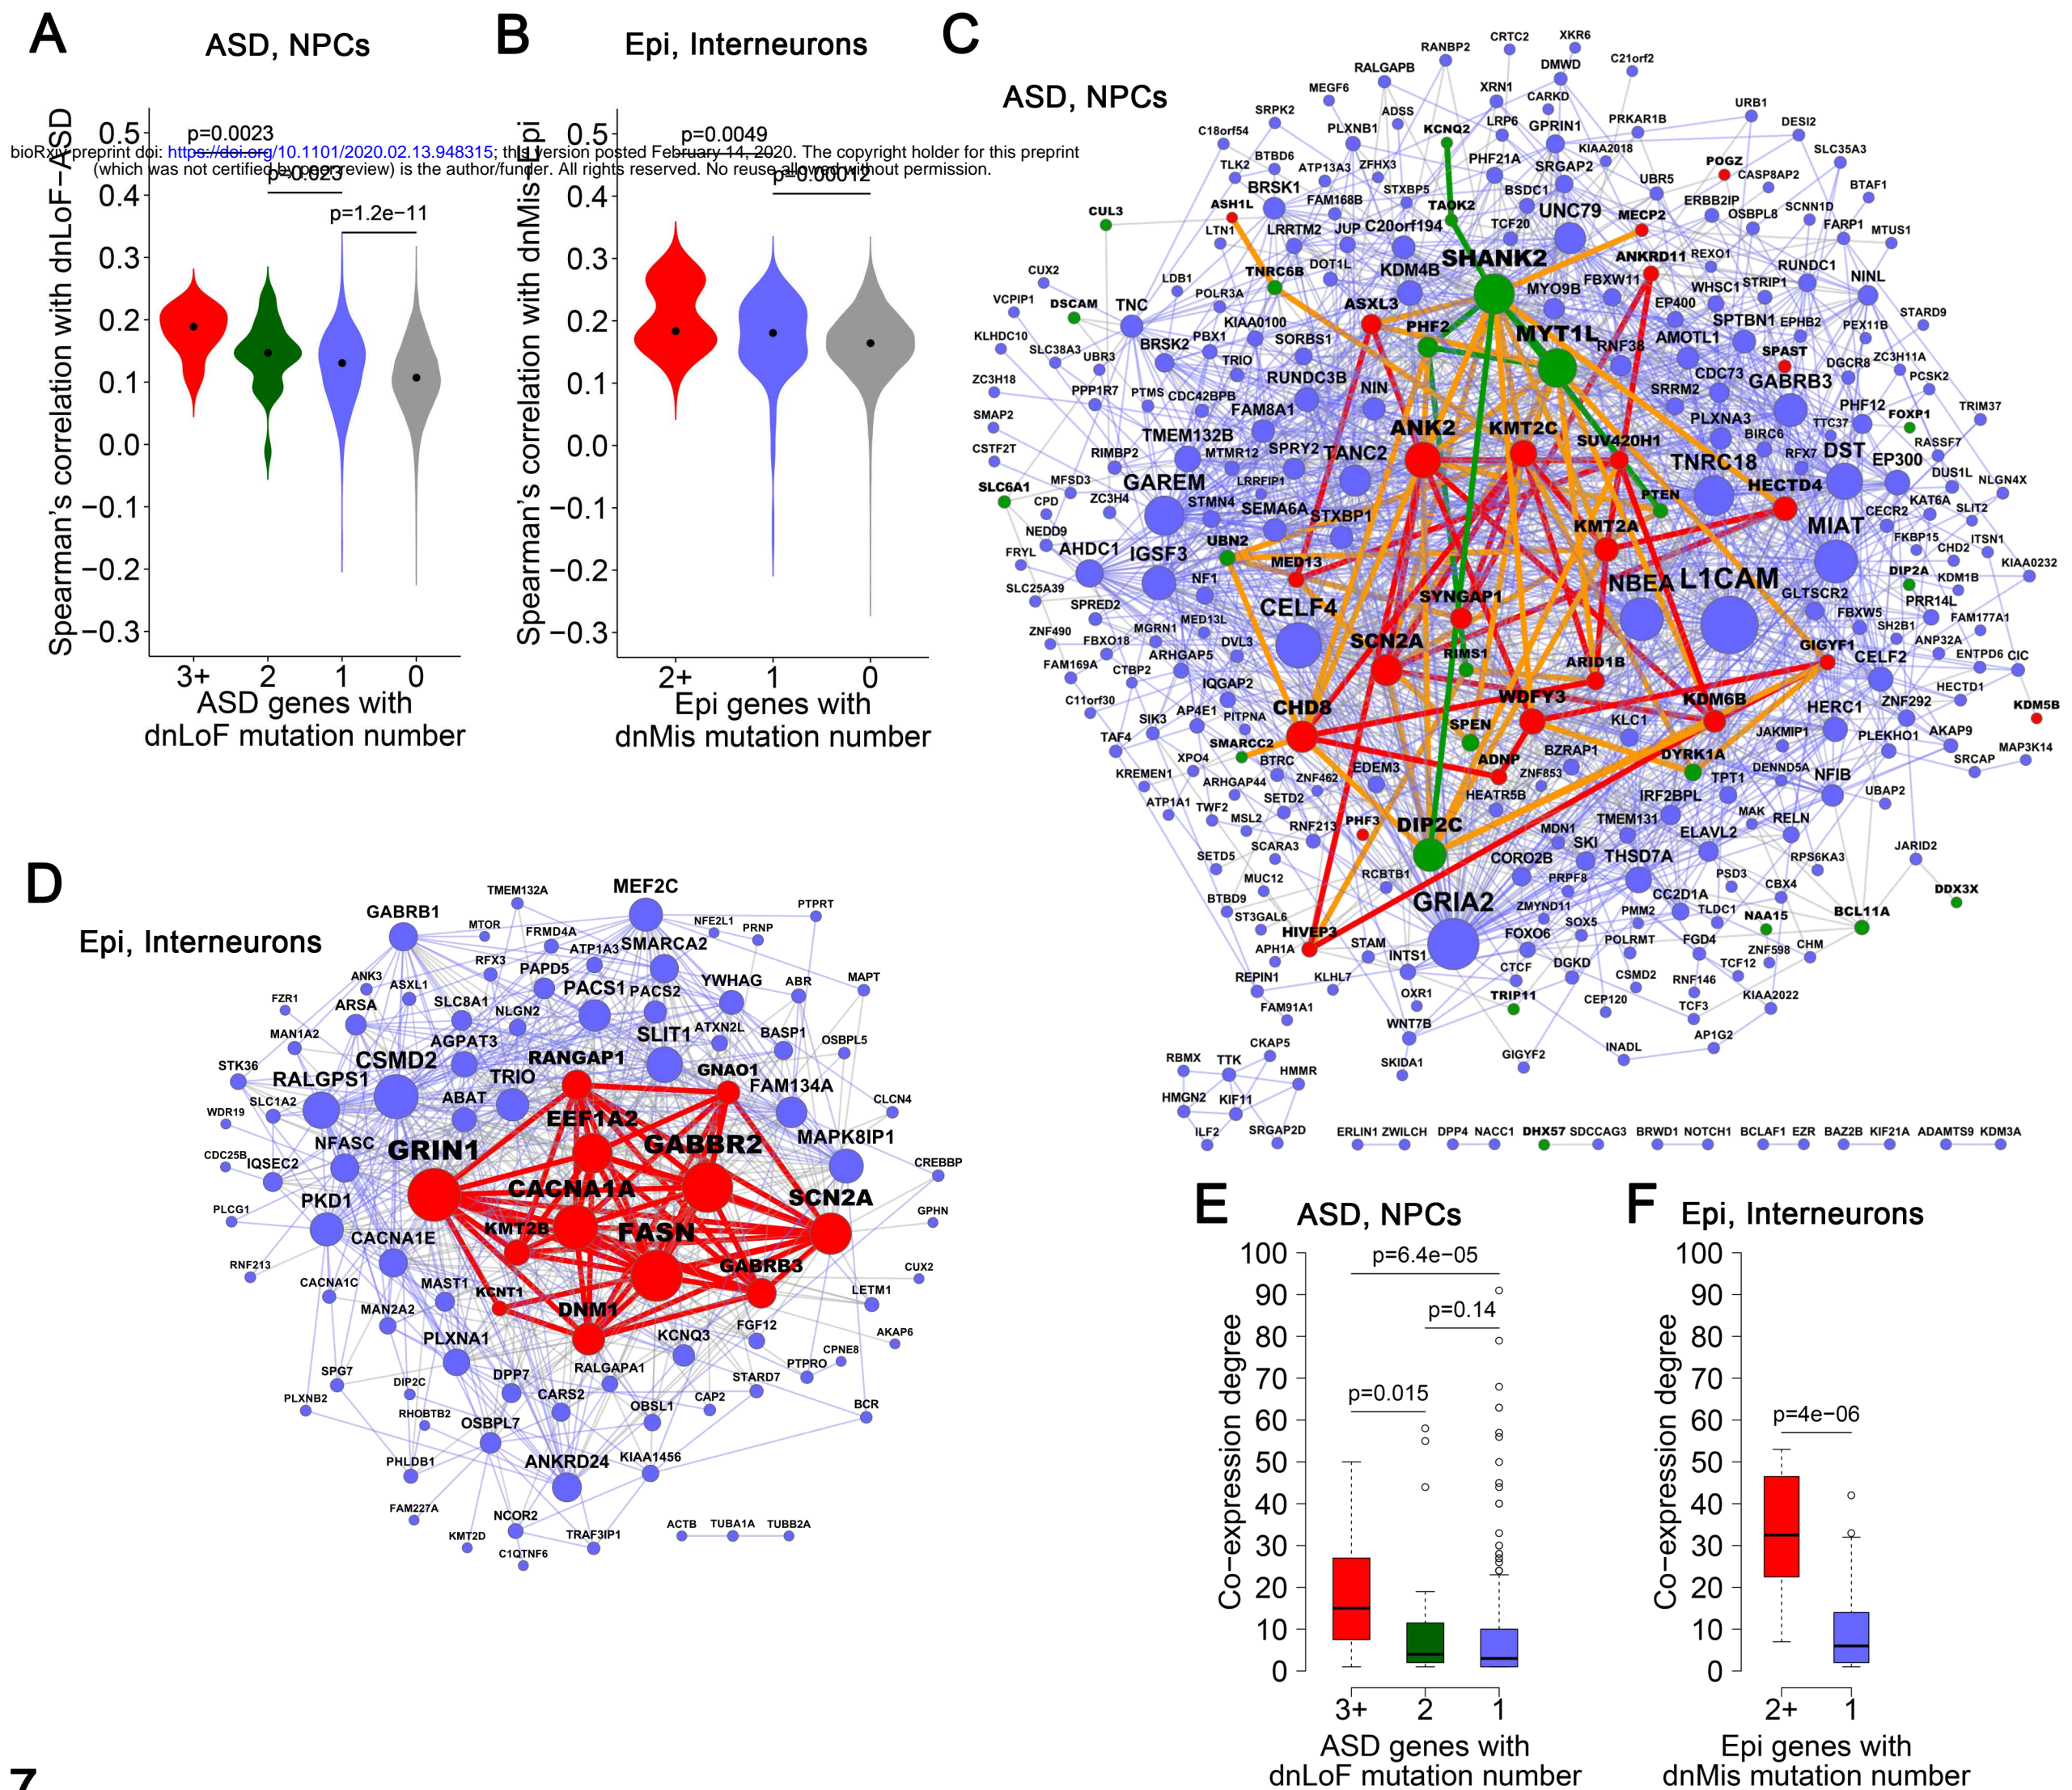

Fig. 7
